# Supplementary material for: Draft genome of the Antarctic dragonfish, Parachaenichthys charcoti
Source: PubMed Central journal article supplement (PMC5597851; doi:10.1093/gigascience/gix060), 2017-07-24
Supplement: gix060_giga-d-17-00041_original-submission.pdf [file gix060_giga-d-17-00041_original-submission.pdf]

1 **Draft genome of the Antarctic dragonfish, *Parachaenichthys charcoti***  
2  
3  
4  
5

6 **Do-Hwan Ahn<sup>1†</sup>, Seung Chul Shin<sup>1†</sup>, Bo-Mi Kim<sup>1†</sup>, Seunghyun Kang<sup>1</sup>, Jin-Hyoung Kim**  
7  
8

9 **<sup>1</sup>, Inhye Ahn<sup>1,2</sup>, Joonho Park<sup>3</sup>, Hyun Park<sup>1,2,\*</sup>**  
10  
11  
12  
13

14 <sup>1</sup> *Unit of Polar Genomics, Korea Polar Research Institute, Incheon 21990, South Korea*  
15  
16

17 <sup>2</sup> *Polar Sciences, University of Science & Technology, Yuseong-gu, Daejeon 34113, South Korea*  
18

19 <sup>3</sup> *Department of Fine Chemistry, Seoul National University of Science and Technology, Seoul 01811*  
20

21 *South Korea*  
22  
23  
24  
25  
26  
27

28 \*Corresponding authors:  
29  
30

31 Unit of Polar Genomics, Korea Polar Research Institute, Incheon 21990, South Korea; E-mail  
32

33 address: hpark@kopri.re.kr (H. Park)  
34  
35

36 †These authors contributed equally to this work.  
37  
38  
39  
40  
41  
42  
43  
44  
45  
46  
47  
48  
49  
50  
51  
52  
53  
54  
55  
56  
57  
58  
59  
60  
61  
62  
63  
64  
65

1 **Abstract**

2  
3 **Background**

4  
5  
6 The Antarctic bathydraconid dragonfish, *Parachaenichthys charcoti*, is an Antarctic  
7  
8 notothenioid teleost endemic to the Southern Ocean. The Southern Ocean has cooled to  $-1.8^{\circ}\text{C}$   
9  
10 over the past 30 million years, and *P. charcoti* has undergone molecular and ecological  
11  
12 diversification to survive in this cold environment. However, little is known about the biology  
13  
14 of this species, except that globin intergenic regulatory regions play a role in its low levels of  
15  
16 alpha-globin expression. To understand the process of evolution of Antarctic fish, we  
17  
18 sequenced and annotated the *P. charcoti* genome.  
19  
20  
21

22  
23 **Findings**

24  
25 The draft genome of *P. charcoti* is 709 Mb in size. The N50 contig length is 6,246 bp and its  
26  
27 N50 scaffold length 166,726 kb, with a GC content of 40.66%. The genome of *P. charcoti* is  
28  
29 predicted to contain 32,712 genes, 18,455 of which have been assigned preliminary functions.  
30  
31 A total of 8,951 orthologous groups common to seven species fish were identified, while 333  
32  
33 genes were identified in *P. charcoti* only; 2,519 orthologous group were also identified in both  
34  
35 *P. charcoti* and *N. coriiceps*, another Antarctic fish. Four gene ontology (GO) terms were  
36  
37 statistically overrepresented among the 333 genes unique to *P. charcoti*, according to GO  
38  
39 enrichment analysis.  
40  
41  
42  
43  
44

45 **Conclusions**

46  
47 The draft *P. charcoti* genome will broaden our understanding of the evolution of Antarctic fish  
48  
49 in their extreme environment. It will provide a basis for further investigating the unusual  
50  
51 characteristics of Antarctic fishes.  
52  
53  
54

55  
56 **Keywords**

57  
58 *Parachaenichthys charcoti*, Antarctic fish, Southern Ocean.  
59  
60  
61  
62  
63  
64  
65

## Data description

Antarctic notothenioid teleosts have evolved to adapt to the extreme Antarctic marine environment. The fish fauna of the Southern Ocean is dominated by a single lineage belonging to the perciform suborder Notothenioidei, consisting of 132 species and 8 families. They survive in the extreme Antarctic marine environment, which includes large seasonal changes in food availability and cold ocean water. Nototheniidae is the most speciose family of the Notothenioidei, the dominant taxonomic component of Antarctic teleosts, making up 90% of the fish biomass of the continental shelf and upper slope [1–4]. *Parachaenichthys charcoti*, the Antarctic bathydraconid dragonfish, was first described by Vaillant in 1906. They are found in localities around Potter Cove, South Shetland Islands. *Parachaenichthys charcoti* remain almost exclusively on the inner shelves throughout their ontogeny [5]. Several studies have investigated their ecology and ethology, but there has been no genomic study [5-8]. A comprehensive genetic study is needed to identify the distinguishing characteristics of this Antarctic fish and to provide useful data for understanding Antarctic teleost divergence and evolution.

## *Library construction and Sequencing*

*P. charcoti* (length: ~45 cm) were collected in nets at depths of 20–30 m in Marian Cove, near King Sejong Station, on the Northern Antarctic Peninsula (62°14'S, 58°47'W) in January 2012 using the hook-and-line method (Fig. 1). High-molecular-weight genomic DNA was extracted from *P. charcoti* using the Genra Puregene Blood Kit (Qiagen). For Illumina MiSeq sequencing, three paired-end libraries were constructed from sheared genomic DNA consisting of 300, 400, and 450 bp fragments and subsequently prepared using standard Illumina sample

preparation methods. Mate-pair libraries (3 kb, 5 kb, 8 kb, and 20 kb) were prepared for scaffolding, and sequencing was performed according to the manufacturer's instructions (illumine, Carlsbad, USA). All sequencing processes for both paired-end and mate-pair libraries were performed by Korea Polar Research Institutes (Table 1).

**Table 1. *P. charcoti* sequencing statistics.**

| Library | Mode    | Insert size | Library type | Trimmed Reads | Trimmed sequence (bp) | Source      |
|---------|---------|-------------|--------------|---------------|-----------------------|-------------|
| PE300   | 2 x 300 | 300         | paired-end   | 28,776,064    | 4,964,428,226         | Genomic DNA |
| PE400   | 2 x 300 | 400         | paired-end   | 139,126,700   | 29,538,419,473        | Genomic DNA |
| PE450   | 2 x 300 | 450         | paired-end   | 85,834,292    | 16,644,575,781        | Genomic DNA |
| MP3K    | 2 x 300 | 3,000       | mate-pair    | 70,517,546    | 4,925,657,177         | Genomic DNA |
| MP5K    | 2 x 300 | 5,000       | mate-pair    | 66,623,428    | 4,626,486,038         | Genomic DNA |
| MP8K    | 2 x 300 | 8,000       | mate-pair    | 61,240,982    | 4,212,744,363         | Genomic DNA |
| MP20K   | 2 x 300 | 20,000      | mate-pair    | 86,575,644    | 5,387,730,972         | Genomic DNA |
| PE500   | 2 x 300 | 500         | paired-end   | 25,940,404    | 5,571,197,784         | Liver RNA   |

The resulting Illumina reads were trimmed using the FASTX-Toolkit (ver. 0.0.11) ([http://hannonlab.cshl.edu/fastx\\_toolkit](http://hannonlab.cshl.edu/fastx_toolkit)) with the parameters -t 20, -l 70, and -Q 33, after which a paired sequence from the trimmed Illumina reads was selected. Finally, paired-end trimmed reads data with 73-fold coverage were obtained (Table 1).

Because expressed sequence tags are essential for gene annotation in draft genomes, Total RNA were extracted from liver tissue and purified using the RNeasy Mini Kit (Qiagen, Valencia, CA) with the RNase-Free DNaseI Kit (Qiagen). Extracted sample quality and concentration were determined with 2100 Bioanalyzer (Agilent Technologies, Santa Clara, CA). Next-generation sequencing (NGS) library was conducted using TruSeq® Sample Preparation v2 (Illumina, San Diego, CA) with total RNA. mRNA was isolated from 2 µg of the total RNA for double-stranded cDNA library construction with poly-A selection. Final transcriptome libraries length

1 and concentration were determined with 2100 Bioanalyzer. Transcriptome libraries were  
2  
3 sequenced by the MiSeq® System (Illumina, San Diego, CA) platform using sequenced runs  
4  
5 of 300×2 paired-end reads. Finally, 38,071,794 raw sequencing reads (5,571 Mb) were  
6  
7 generated in *P. charcoti* liver transcriptome libraries (Table 1).  
8  
9

### 10 11 12 **Genome assembly**

13  
14  
15 K-mer analysis was conducted using Jellyfish 2.2.5 [9] to estimate the genome size from DNA  
16  
17 paired-end libraries. The estimated genome size is 805 Mb, with the main peak observed at a  
18  
19 coverage depth of ~39x (Fig. 2). Initial assemblies were performed using the Celera Assembler  
20  
21 (ver. 8.3) with trimmed paired-end reads [10]. For the Celera Assembler, paired-end read data  
22  
23 were converted into FRG file format using FastqToCA, which is a utility included in the Celera  
24  
25 Assembler. Assembly was performed on a 80-processor workstation using Intel Xeon X7460  
26  
27 2.66 GHz processors and 1 Tb RAM with the following parameters: overlapper = ovl, unitigger  
28  
29 = bogart, utgErrorRate = 0.03, utgErrorLimit = 2.5, utgGraphErrorRate = 0.030,  
30  
31 utgGraphErrorLimit = 3.25, ovlErrorRate = 0.06, cnsErrorRate = 0.06, cgwErrorRate = 0.1,  
32  
33 merSize = 28, doOverlapBasedTrimming = 1, merylMemory = 500000, merylThreads = 40,  
34  
35 ovlMemory = 8 Gb, ovlThreads = 2, ovlConcurrency = 40, ovlHashBlockLength = 300000000,  
36  
37 ovlRefBlockSize = 7630000, and ovlHashBits = 24. The initial assembly had a total size of  
38  
39 709 Mb, N50 contig length of 5,039 bp, and N50 scaffold length of 6,135 kb with a GC content  
40  
41 of 40.66%. The assembled contig revealed a contig coverage of approximately 36.57x. Contigs  
42  
43 from the initial assembly were used for scaffolding using the stand-alone scaffolding tool  
44  
45 SSPACE (ver. 2.0) [11]. Trimmed mate-pair reads created using the FASTX-Toolkit were used  
46  
47 in the scaffolding process. After scaffolding, the number of scaffolds decreased from 153,398  
48  
49  
50  
51  
52  
53  
54  
55  
56  
57 to 12,381, and the N50 scaffold length increased from 6,135 to 166,726 bp (Table 2).  
58  
59  
60  
61  
62  
63  
64  
65

## 1 *Gene annotation*

2  
3 MAKER was used for genome annotation [12]. We first identified repetitive elements using  
4 RepeatMasker (ver. 3.3.0) [13], and this masked genome sequence was used for *ab initio* gene  
5 prediction using the SNAP software [14]. Alignment of expressed sequence tags using  
6 BLASTn and homologous protein information from tBLASTx were considered for gene  
7 annotation. Proteins from six species were used in the analysis: *Notothenia coriiceps* (NCBI  
8 reference sequence NC\_015653.1) and *Danio rerio*, *Gasterosteus aculeatus*, *Takifugu rubripes*,  
9 *Tetraodon nigroviridis*, and *Gadus morhua* (all from Ensembl release 69). Transcriptome  
10 assembly results, which were generated using CLC Genomics Workbench 8.0, were used for  
11 expressed sequence tags.  
12

13 MAKER was used to select and revise the final gene model based on all inputs. A total of  
14 32,712 genes were predicted in *P. charcoti* using MAKER, and 61,709 *ab initio* predictions  
15 with insufficient evidence were generated (Table 2). The annotated genes contained an average  
16 of eight exons, with an average mRNA length of 1,412 bp and CDS length of 1,291 bp. The  
17 repeat prediction from MAKER showed that repeat sequences accounted for 19.41% of the  
18 assembled *P. charcoti* genome.  
19

20 To estimate genome assembly and annotation completeness, we performed BUSCO  
21 (Benchmarking Universal Single-Copy Orthologs) [15] analysis, an approach used for lineage-  
22 specific profile libraries, such as those of eukaryotes, metazoans, and vertebrates, and identified  
23 88.4% complete and 6.3% partial eukaryote orthologous gene sets in our assembly (Table 3).  
24 In the metazoan gene set, 90.4% complete and 6.5% partial genes were identified, and in the  
25 vertebrate gene set, 81.8% complete and 13.5% partial genes were identified.  
26

27 To assign preliminary functions for 32,712 genes, we used Blast2GO (ver. 2.6.0) [16]. We  
28 classified functions for 18,455 (56.42%) predicted genes, which were annotated using BLASTp  
29 results and InterproScan. Gene ontology (GO) annotation terms included “biological process”  
30  
31  
32  
33  
34  
35  
36  
37  
38  
39  
40  
41  
42  
43  
44  
45  
46  
47  
48  
49  
50  
51  
52  
53  
54  
55  
56  
57  
58  
59  
60  
61  
62  
63  
64  
65

(20,126, 61.52%), “molecular function” (20,514, 62.71%), and “cellular component” (15,452, 47.23%). Enzyme commission numbers were obtained for 3,846 proteins.

**Table 2. Global statistics of the *P. charcoti* genome assembly.**

|                              |                               | <i>P. charcoti</i> |
|------------------------------|-------------------------------|--------------------|
| Scaffold                     | Total scaffold length (bases) | 794596176          |
|                              | Gap size (bases)              | 86840902           |
|                              | Scaffolds (n)                 | 12602              |
|                              | N50 scaffold length (bases)   | 178362             |
|                              | Max scaffold length (bases)   | 1318127            |
| Contig                       | Total contig length (bases)   | 709540340          |
|                              | Contigs (n)                   | 153398             |
|                              | N50 contig length (bases)     | 6145               |
|                              | Max contig length (bases)     | 65864              |
| Gene Number (n)              |                               | 32712              |
| Repeat content (% of genome) |                               | 19.4               |

**Table 3. Summarized benchmarks of the BUSCO (Benchmarking Universal Single-Copy Orthologs) assessment.**

|                             | Eukaryote (%) | Metazoa (%) | Vertebrate (%) |
|-----------------------------|---------------|-------------|----------------|
| Total BUSCO groups searched | 303*          | 978*        | 2586*          |
| Complete BUSCOs             | 88.4          | 90.4        | 81.8           |
| Complete and single-copy    | 87.1          | 87.7        | 80.6           |
| Complete and duplicated     | 1.3           | 2.7         | 1.2            |
| Fragmented                  | 6.3           | 6.5         | 13.5           |
| Missing                     | 5.3           | 3.1         | 0.7            |

\* Number of total BUSCO groups searched

### *Ortholog analysis*

We identified orthologous groups using OrthoMCL (ver. 2.0.5) [17], which generated a

graphical representation of the sequence relationships, which were then presented in subgraphs using the Markov Clustering Algorithm based on multiple eukaryotic genomes. We used the standard parameters and options within OrthoMCL for all steps. We used seven fish genomes for this analysis (*D. rerio*, *G. aculeatus*, *T. rubripes*, *T. nigroviridis*, *G. morhua*, *N. coriiceps*, and *P. charcoti*), and the coding sequences of five genomes were collected from Ensembl release 69. We used the coding sequence from the NCBI reference sequence (NC\_015653.1) of *N. coriiceps* and the coding sequence of *P. charcoti* from MAKER annotation. We identified 8,951 orthologous groups common to all seven fish; 288 of 32,636 *N. coriiceps* genes and 333 of 32,712 *P. charcoti* genes were not identified in any other species, and 2,519 groups were identified only in the two Antarctic fish (Fig. 3A). Subsequently, gene gain-and loss was analyzed in seven representative fish species, *P. charcoti* gained 937 and lost 1916 gene families (Fig. 3B).

### ***GO enrichment test***

We analyzed the 333 genes that were identified only in *P. charcoti* for statistically overrepresented GO terms [18]. We used AgriGO [14], a web-based tool for GO analysis, with a significance threshold of  $P = 0.05$ . We examined the complete hierarchies of GO terms for each gene. Four GO terms were identified by GO enrichment analysis (Table 4) within the category of “biological process”: “organic substance/metabolic process” (GO:0071704), “peptidyl-tyrosine phosphorylation” (GO:0018108), “peptidyl-tyrosine modification” (GO:0018212), and “cell communication” (GO:0007154). Orthologous groups in the two Antarctic fish were also analyzed, and 16 GO terms in the “biological process” category were statistically overrepresented (Table 5).

**Table 4. GO terms statistically overrepresented in *P. charcoti* only.**

| GO ID | GO tree | GO term | Gene number | P-value | FDR |
|-------|---------|---------|-------------|---------|-----|
|-------|---------|---------|-------------|---------|-----|



|            |   |                                     |     |          |        |
|------------|---|-------------------------------------|-----|----------|--------|
| GO:0071704 | P | organic substance metabolic process | 13  | 5.00E-06 | 0.0069 |
| GO:0018108 | P | peptidyl-tyrosine phosphorylation   | 38  | 5.50E-05 | 0.023  |
| GO:0018212 | P | peptidyl-tyrosine modification      | 38  | 6.60E-05 | 0.023  |
| GO:0007154 | P | cell communication                  | 173 | 5.20E-05 | 0.023  |

**Table 5. GO terms statistically overrepresented in the two Antarctic fish only.**

| GO ID      | GO tree | GO term                                              | Gene number | P-value  | FDR      |
|------------|---------|------------------------------------------------------|-------------|----------|----------|
| GO:0031497 | P       | chromatin assembly                                   | 9           | 2.80E-06 | 8.90E-05 |
| GO:0006334 | P       | nucleosome assembly                                  | 9           | 2.80E-06 | 8.90E-05 |
| GO:0065004 | P       | protein-DNA complex assembly                         | 9           | 2.80E-06 | 8.90E-05 |
| GO:0034728 | P       | nucleosome organization                              | 9           | 2.80E-06 | 8.90E-05 |
| GO:0006333 | P       | chromatin assembly or disassembly                    | 9           | 2.80E-06 | 8.90E-05 |
| GO:0006323 | P       | DNA packaging                                        | 9           | 2.80E-06 | 8.90E-05 |
| GO:0071103 | P       | DNA conformation change                              | 9           | 8.20E-05 | 0.0022   |
| GO:0034622 | P       | cellular macromolecular complex assembly             | 14          | 0.00016  | 0.0039   |
| GO:0006184 | P       | GTP catabolic process                                | 11          | 0.0004   | 0.0084   |
| GO:0046039 | P       | GTP metabolic process                                | 11          | 0.00057  | 0.011    |
| GO:0034621 | P       | cellular macromolecular complex subunit organization | 14          | 0.0009   | 0.015    |
| GO:0051276 | P       | chromosome organization                              | 12          | 0.0016   | 0.025    |
| GO:0006325 | P       | chromatin organization                               | 10          | 0.0019   | 0.028    |
| GO:0000723 | P       | telomere maintenance                                 | 3           | 0.0024   | 0.03     |
| GO:0032200 | P       | telomere organization                                | 3           | 0.0024   | 0.03     |
| GO:0051258 | P       | protein polymerization                               | 5           | 0.0037   | 0.043    |

1 In this study, we report the annotated draft genome sequence for *P. charcoti*. Along with the  
2  
3 recently published *N. coriiceps* genome [19], this new genomic information will broaden our  
4  
5 understanding of how Antarctic fish have evolved to survive in sub-zero temperatures.  
6  
7  
8  
9

### 10 **Availability of supporting data**

11 The data for *P. charcoti* genome and transcriptome has been deposited in the PRJNA330735.  
12  
13  
14  
15  
16  
17

### 18 **Competing interests**

19 The authors declare no competing interests.  
20  
21  
22  
23  
24

### 25 **Funding**

26 This work was supported by a grant, entitled ‘Polar Genomics 101 Project (PE17080)’ funded  
27  
28 by the Korea Polar Research Institute.  
29  
30  
31  
32  
33  
34

### 35 **Author contributions**

36 H.P. conceived and designed experiments and analyses. D. H. A., S.C.S., B.K., S.K., J.K.,  
37  
38 I.A. and J.P. performed experiments and conducted bioinformatics. D. H. A., S.C.S., B.K.  
39  
40 and H.P. wrote the paper.  
41  
42  
43  
44  
45  
46

### 47 **References**

- 48 1. Eastman JT, Pratt D, Winn W. *Antarctic fish biology: evolution in a unique environment*.  
49  
50 Academic Press San Diego; 1993.  
51  
52
- 53 2. Eastman JT, Clarke A. A comparison of adaptive radiations of Antarctic fish with those of  
54  
55 nonAntarctic fish. *Fishes of Antarctica*. Springer; 1998, p. 3-26.  
56  
57  
58  
59  
60  
61  
62  
63  
64  
65

- 1 3. Eastman JT. Antarctic notothenioid fishes as subjects for research in evolutionary biology.  
2  
3 *Antarctic Science*. 2000;**12**:276-87.  
4
- 5 4. Eakin RR, Eastman JT, Near TJ. A new species and a molecular phylogenetic analysis of  
6 the Antarctic fish genus Pogonophryne (Notothenioidei: Artedidraconidae). *Copeia*.  
7  
8 2009;**4**:705-13.  
9
- 10 5. Casaux R, Mazzotta A, Barrera-Oro E. Seasonal aspects of the biology and diet of  
11 nearshore nototheniid fish at Potter Cove, South Shetland Islands, Antarctica. *Polar*  
12  
13 *Biology*. 1990;**11**:63-72.  
14  
15
- 16 6. Barrera-Oro E. The role of fish in the Antarctic marine food web: differences between  
17 inshore and offshore waters in the southern Scotia Arc and west Antarctic Peninsula.  
18  
19 *Antarctic Science*. 2002;**14**:293-309.  
20
- 21 7. Barrera-Oro ER, Lager C. Egg-guarding behaviour in the Antarctic bathydraconid  
22 dragonfish *Parachaenichthys charcoti*. *Polar biology*. 2010;**33**:1585-7.  
23  
24
- 25 8. Eastman JT, Sidell BD. Measurements of buoyancy for some Antarctic notothenioid fishes  
26 from the South Shetland Islands. *Polar Biology*. 2002;**25**:753-60.  
27  
28
- 29 9. Marçais G, Kingsford C. A fast, lock-free approach for efficient parallel counting of  
30 occurrences of k-mers. *Bioinformatics*. 2011;**27**:764-770.  
31  
32
- 33 10. Myers EW, Sutton GG, Delcher AL, Dew IM, Fasulo DP, et al. A whole-genome  
34 assembly of *Drosophila*. *Science*. 2000;**287**: 2196-2204.  
35  
36
- 37 11. Boetzer M, Henkel CV, Jansen HJ, Butler D, Pirovano W. Scaffolding pre-assembled  
38 contigs using SSPACE. *Bioinformatics*. 2011;**27**:578-579.  
39  
40
- 41 12. Cantarel BL, Korf I, Robb SM, Parra G, Ross E, et al. MAKER: an easy-to-use  
42 annotation pipeline designed for emerging model organism genomes. *Genome Research*.  
43  
44 2008;**18**:188-196.  
45  
46
- 47 13. Tarailo-Graovac M, Chen N. Using RepeatMasker to identify repetitive elements in  
48  
49  
50  
51  
52  
53  
54  
55  
56  
57  
58  
59  
60  
61  
62  
63  
64  
65

- 1 genomic sequences. *Current Protocols in Bioinformatics*: 2009;**25**:4.10.1-4.10.14  
2  
3  
4 14. Korf I. Gene finding in novel genomes. *BMC Bioinformatics*. 2004;**5**:1.  
5  
6 15. Simão FA, Waterhouse RM, Ioannidis P, Kriventseva EV, Zdobnov EM. BUSCO:  
7  
8 assessing genome assembly and annotation completeness with single-copy orthologs.  
9  
10 *Bioinformatics*. 2015;**31**:3210-3212.  
11  
12 16. Conesa A, Götz S, García-Gómez JM, Terol J, Talón M, et al. Blast2GO: a universal tool  
13  
14 for annotation, visualization and analysis in functional genomics research. *Bioinformatics*.  
15  
16 2005;**21**:3674-3676.  
17  
18 17. Li L, Stoeckert CJ, Roos DS. OrthoMCL: identification of ortholog groups for eukaryotic  
19  
20 genomes. *Genome Research*. 2003;**13**:2178-2189.  
21  
22 18. Du Z, Zhou X, Ling Y, Zhang Z, Su Z. agriGO: a GO analysis toolkit for the agricultural  
23  
24 community. *Nucleic Acids Research*. 2010;**38**: doi:10.1093/nar/gkq310  
25  
26 19. Shin SC, Ahn DH, Kim SJ, Pyo CW, Lee H, et al. The genome sequence of the Antarctic  
27  
28 bullhead notothen reveals evolutionary adaptations to a cold environment. *Genome*  
29  
30 *Biology*. 2014;**15**:468.  
31  
32  
33  
34  
35  
36  
37  
38  
39  
40  
41  
42  
43  
44  
45  
46  
47  
48  
49  
50  
51  
52  
53  
54  
55  
56  
57  
58  
59  
60  
61  
62  
63  
64  
65

1 **Figure Legends**  
2  
3  
4

5 **Figure 1. Photograph of Antarctic dragonfish, *P. charcoti*.**  
6  
7

8  
9 **Figure 2. Estimation of the *P. charcoti* genome size based on 39-mer analysis.** X-axis  
10 represents the depth (peak at 39×) and the y-axis represents the proportion. Genome size was  
11  
12 estimated to be 805 Mb (total k-mer number/volume peak).  
13  
14  
15  
16

17  
18 **Figure 3. Comparative genome analyses of the *P. charcoti* genome.**  
19

20 A. Venn diagram of orthologous gene clusters between four arthropod lineages. B. Gene family  
21 gain-and-loss analysis. The number of gained gene families and lost gene families are indicated  
22  
23 for each species. Time lines specify divergence times between the lineages.  
24  
25  
26  
27  
28  
29  
30  
31  
32  
33  
34  
35  
36  
37  
38  
39  
40  
41  
42  
43  
44  
45  
46  
47  
48  
49  
50  
51  
52  
53  
54  
55  
56  
57  
58  
59  
60  
61  
62  
63  
64  
65

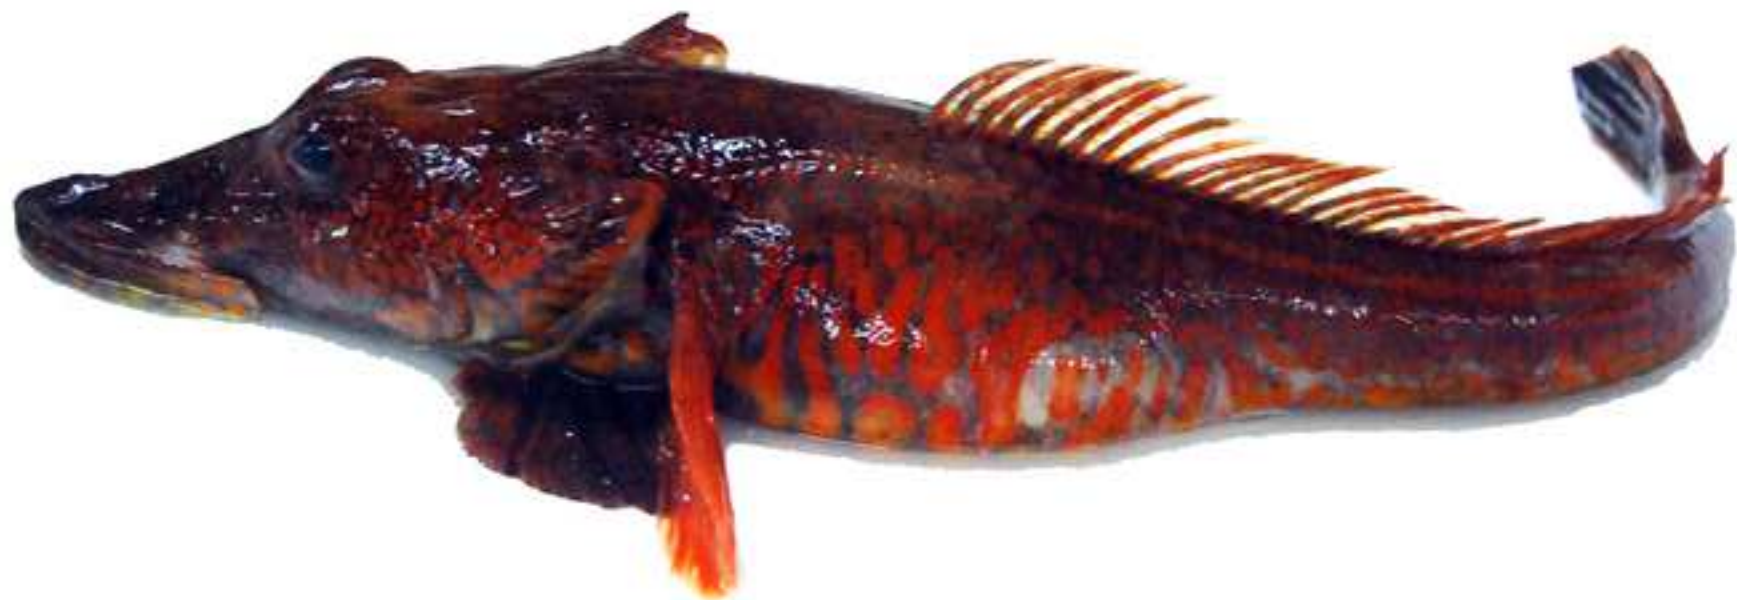

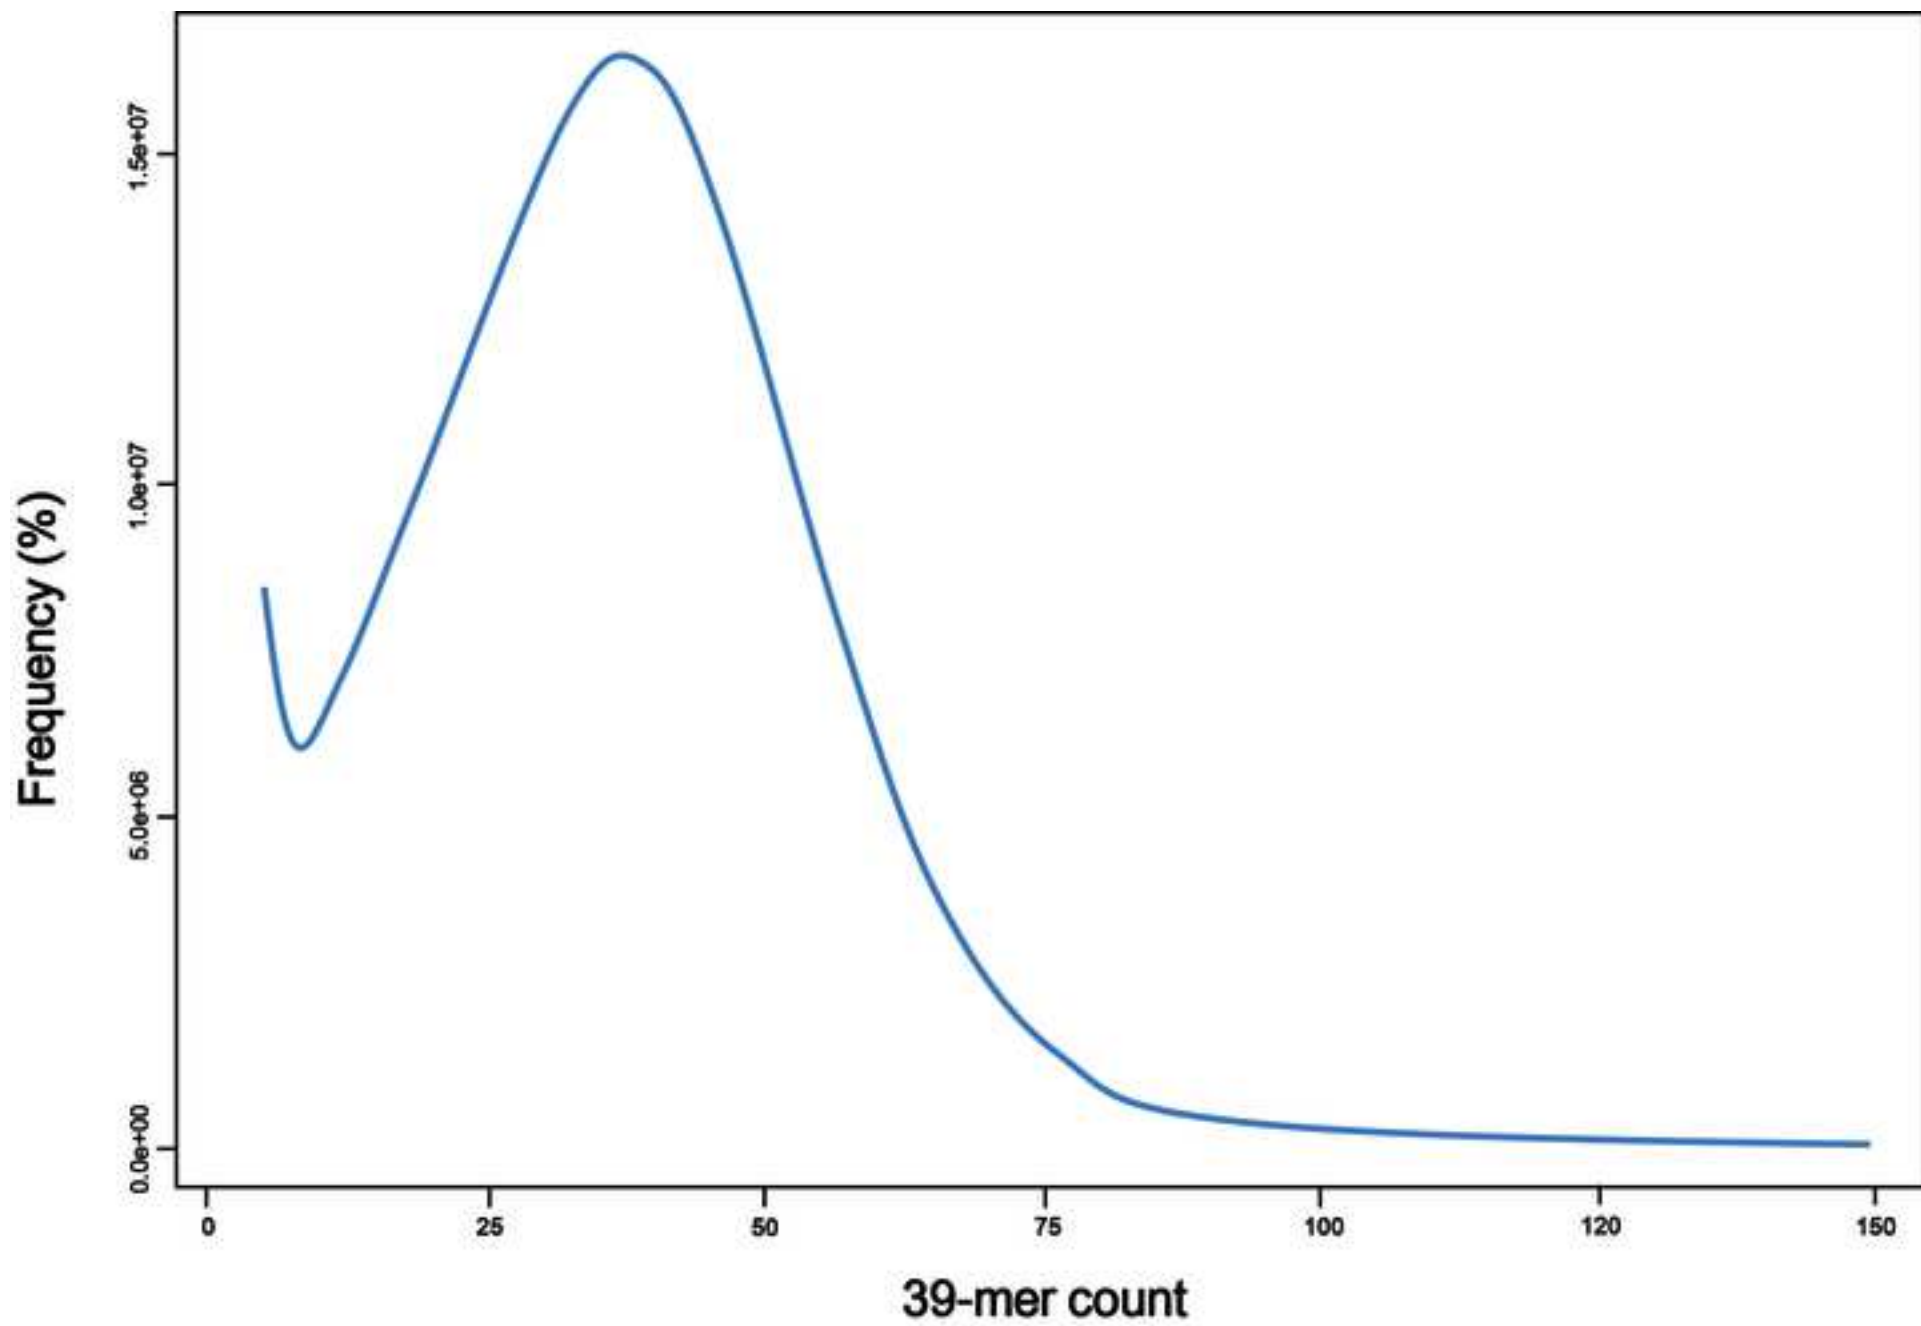

A

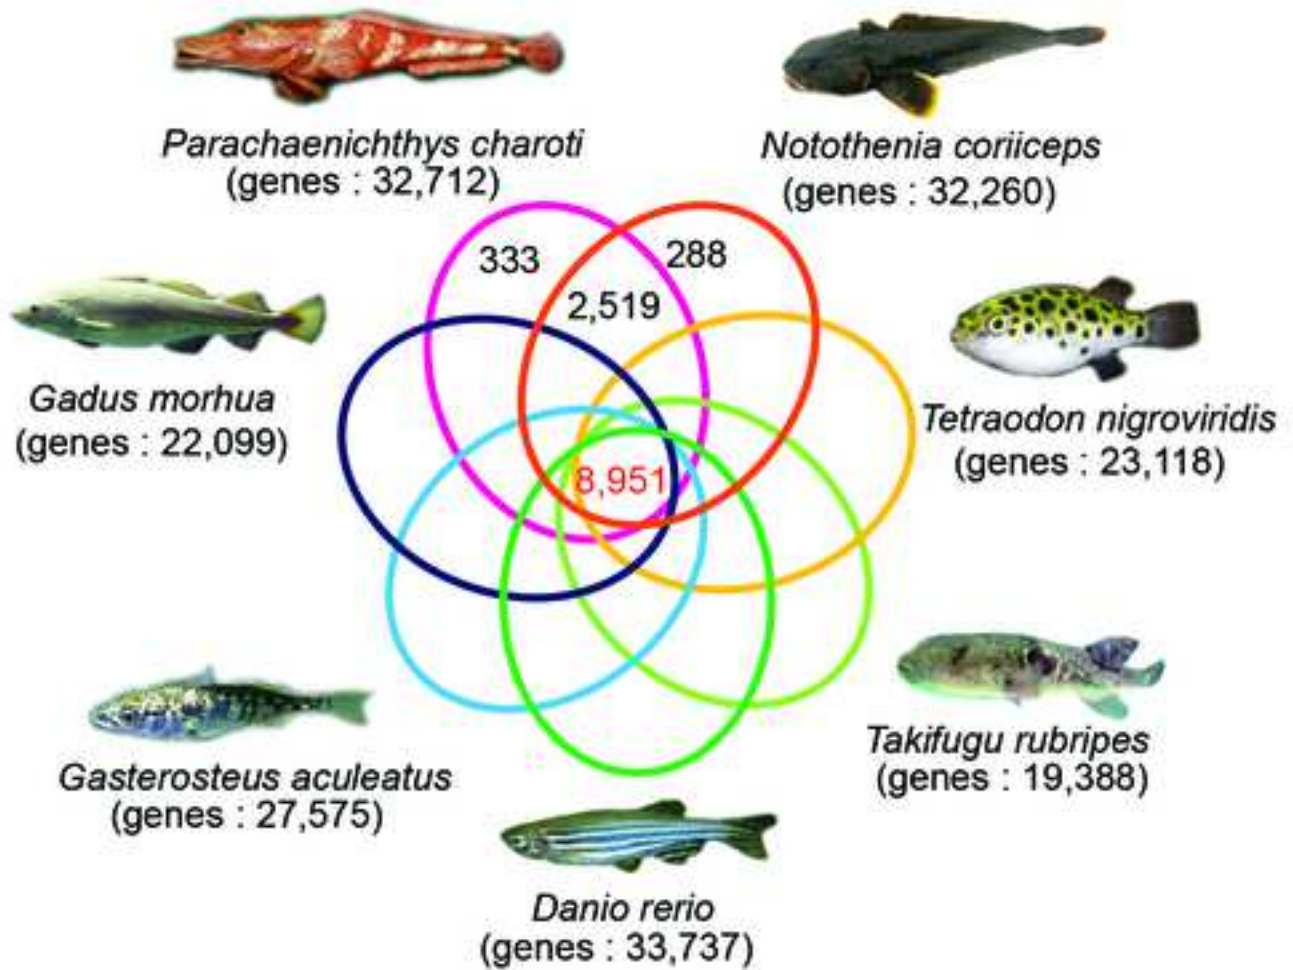

B

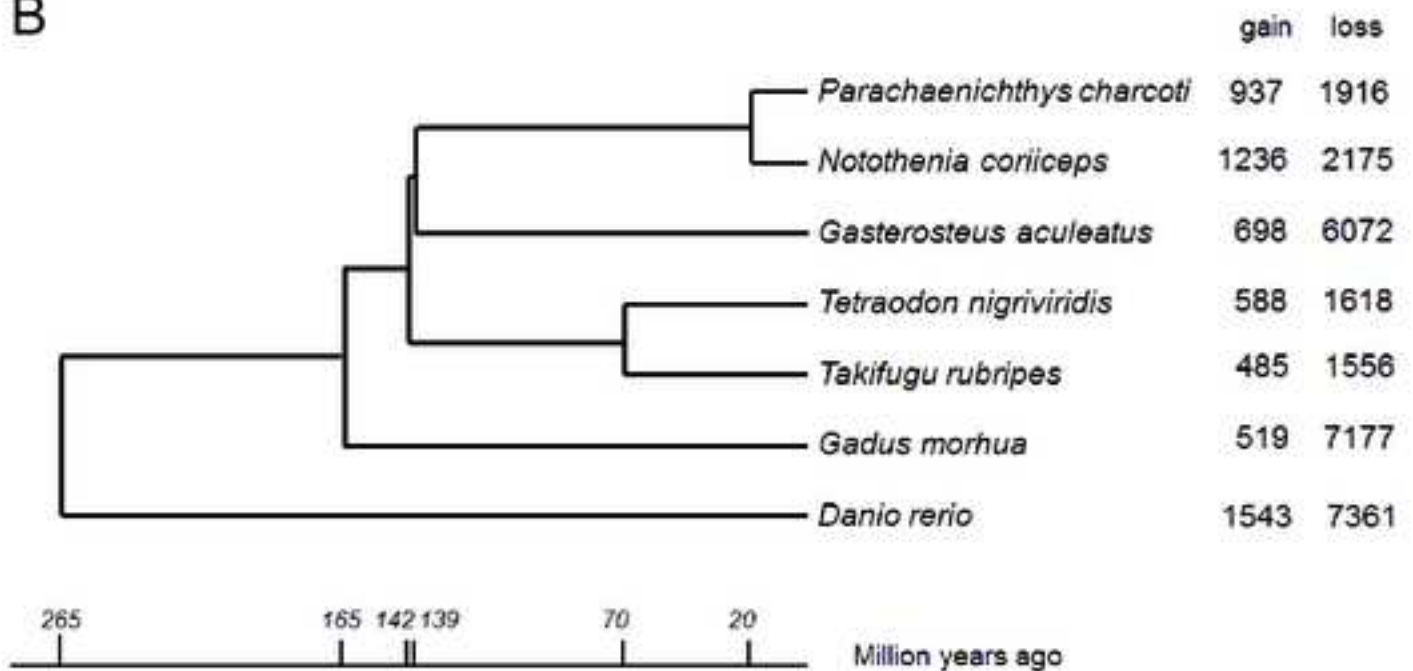



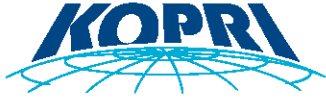

Feb 25, 2017

**Dear Editor of GigaScience,**

We hope you will consider our manuscript, “Draft genome of the Antarctic dragonfish, *Parachaenichthys charcoti*” as a Data note in GigaScience. All authors are aware of, and accept responsibility for, the manuscript. The accompanying manuscript is original work, not published elsewhere or under consideration for publication elsewhere.

Antarctic notothenioid teleosts have evolved to adapt to the extreme Antarctic marine environment. The fish fauna of the Southern Ocean is dominated by a single lineage belonging to the perciform suborder Notothenioidei, consisting of 132 species and 8 families. They survive in the extreme Antarctic marine environment, which includes large seasonal changes in food availability and cold ocean water. Nototheniidae is the most speciose family of the Notothenioidei, the dominant taxonomic component of Antarctic teleosts, making up 90% of the fish biomass of the continental shelf and upper slope. *Parachaenichthys charcoti*, the Antarctic bathydraconid dragonfish, remain almost exclusively on the inner shelves throughout their ontogeny. Several studies have investigated their ecology and ethology, but there has been no genomic study.

To identify the distinguishing characteristics of this Antarctic fish, a comprehensive genetic study is needed. We hope to provide useful data for understanding Antarctic teleost divergence and evolution. Therefore, we believe the draft *P. charcoti* genome will broaden our understanding of the evolution of Antarctic fish in their extreme environment and provide a basis information for further investigating the unusual characteristics of Antarctic fishes.

Thank you very much for your consideration of this paper,

A handwritten signature in black ink that reads 'Hyun Park'. The signature is written in a cursive, flowing style.

Hyun Park,

Hyun Park, Ph. D.  
Korea Polar Research Institute  
26 Songdomirae-ro, Yeonsu-gu,  
Incheon 21990, South Korea  
Tel: +82-32-760-5570/Fax: +82-32-760-5575  
e-mail: [hpark@kopri.re.kr](mailto:hpark@kopri.re.kr)
