# Supplementary material for: Draft genome of the Antarctic dragonfish, Parachaenichthys charcoti
Source: PubMed Central journal article supplement (PMC5597851; doi:10.1093/gigascience/gix060), 2017-07-24
Supplement: gix060_giga-d-17-00041_revision-1.pdf [file gix060_giga-d-17-00041_revision-1.pdf]

1 **Draft genome of the Antarctic dragonfish, *Parachaenichthys charcoti***

2  
3  
4 2  
5  
6 3 **Do-Hwan Ahn<sup>1,†</sup>, Seung Chul Shin<sup>1,†</sup>, Bo-Mi Kim<sup>1,†</sup>, Seunghyun Kang<sup>1</sup>, Jin-Hyoung**

7  
8  
9  
10 4 **Kim<sup>1</sup>, Inhye Ahn<sup>1,2</sup>, Joonho Park<sup>3,\*</sup>, Hyun Park<sup>1,2,\*</sup>**

11  
12 5  
13  
14  
15 6 *<sup>1</sup>Unit of Polar Genomics, Korea Polar Research Institute, Incheon 21990, South Korea*

16  
17 7 *<sup>2</sup>Polar Sciences, University of Science & Technology, Yuseong-gu, Daejeon 34113, South Korea*

18  
19 8 *<sup>3</sup>Department of Fine Chemistry, Seoul National University of Science and Technology, Seoul 01811,*  
20  
21 *South Korea*

22 9  
23  
24 10  
25  
26 11  
27  
28 12 \*Co-corresponding authors:

29  
30  
31 13 Unit of Polar Genomics, Korea Polar Research Institute, Incheon 21990, South Korea; E-mail  
32  
33 14 address: hpark@kopri.re.kr (H. Park)

34  
35  
36 15 Department of Fine Chemistry, Seoul National University of Science and Technology, Seoul  
37  
38 16 01811 South Korea; E-mail address: jhpark21@seoultech.ac.kr (J. Park)

39  
40  
41 17  
42  
43 18  
44  
45 19 <sup>†</sup>These authors contributed equally to this work.

46  
47  
48  
49 20  
50  
51 21  
52  
53  
54 22  
55  
56 23  
57  
58  
59  
60  
61  
62  
63  
64  
65

1 24 **Abstract**

2  
3 25 **Background**

4  
5  
6 26 The Antarctic bathydraconid dragonfish, *Parachaenichthys charcoti*, is an Antarctic  
7  
8 27 notothenioid teleost endemic to the Southern Ocean. The Southern Ocean has cooled to  
9  
10 28  $-1.8^{\circ}\text{C}$  over the past 30 million years, and the seawater had retained cold temperature and  
11  
12 29 isolated oceanic environment by Antarctic Circumpolar Current (ACC). Notothenioids  
13  
14 30 dominate Antarctic fish, making up 90% biomass and all notothenioids have undergone  
15  
16 31 molecular and ecological diversification to survive in this cold environment. Therefore, they  
17  
18 32 are considered an attractive Antarctic fish model for evolutionary and ancestral genomic  
19  
20 33 studies. Bathydraconidae is a speciose family of the Notothenioidei, the dominant taxonomic  
21  
22 34 component of Antarctic teleosts. To understand the process of evolution of Antarctic fish, we  
23  
24 35 select a typical Antarctic bathydraconid dragonfish, *P. charcoti*. Here, we have sequenced, *de*  
25  
26 36 *novo* assembled and annotated a comprehensive genome from *P. charcoti*.  
27  
28  
29  
30  
31

32  
33 37 **Findings**

34  
35 38 The draft genome of *P. charcoti* is 709 Mb in size. The N50 contig length is 6,145 bp and its  
36  
37 39 N50 scaffold length 178,362 kb. The genome of *P. charcoti* is predicted to contain 32,712  
38  
39 40 genes, 18,455 of which have been assigned preliminary functions. A total of 8,951  
40  
41 41 orthologous groups common to seven species fish were identified, while 333 genes were  
42  
43 42 identified in *P. charcoti* only; 2,519 orthologous group were also identified in both *P. charcoti*  
44  
45 43 and *N. coriiceps*, another Antarctic fish. Four gene ontology (GO) terms were statistically  
46  
47 44 overrepresented among the 333 genes unique to *P. charcoti*, according to GO enrichment  
48  
49 45 analysis.  
50  
51  
52  
53

54 46 **Conclusions**

55  
56  
57 47 The draft *P. charcoti* genome will broaden our understanding of the evolution of Antarctic  
58  
59 48 fish in their extreme environment. It will provide a basis for further investigating the unusual  
60  
61  
62  
63  
64  
65

1 49 characteristics of Antarctic fishes.  
2  
3

4 50

5 51 **Keywords**  
6

7 52 *Parachaenichthys charcoti*, Antarctic dragonfish, Notothenioid, *De novo* genome assembly,  
8  
9  
10 53 Genome annotation.  
11

12 54

13 55

14 56 **Data description**  
15  
16  
17

18 57 ***Introduction***  
19

20 58 The fish fauna of the Southern Ocean is dominated by a single lineage belonging to the  
21  
22  
23 59 perciform suborder Notothenioidei, consisting of 132 species and 8 families. All Antarctic  
24  
25 60 notothenioids have evolved to adapt to the extreme Antarctic marine environment, which  
26  
27  
28 61 includes large seasonal changes in food availability and stably cold water temperature.  
29  
30 62 Notothenioids dominate Antarctic fish, making up 90% biomass and all notothenioids have  
31  
32  
33 63 undergone molecular and ecological diversification to survive in this cold environment.  
34  
35 64 Therefore, they are considered an attractive Antarctic fish model for evolutionary and  
36  
37  
38 65 ancestral genomic studies. Bathydraconidae is a speciose family of the Notothenioidei, the  
39  
40 66 dominant taxonomic component of Antarctic teleosts [1-4]. *Parachaenichthys charcoti*, the  
41  
42  
43 67 Antarctic bathydraconid dragonfish, was first described by Vaillant in 1906 (Notothenioidei:  
44  
45 68 Bathydraconidae) (AphiaID: 234687; Fishbase ID: 7102). They are found in localities around  
46  
47  
48 69 Potter Cove, South Shetland Islands. *P. charcoti* remain almost exclusively on the inner  
49  
50 70 shelves throughout their ontogeny [5]. Several studies have investigated their ecology and  
51  
52 71 ethology, but there has been no genomic study [5-8]. A comprehensive genetic study is  
53  
54  
55 72 needed to identify the distinguishing characteristics of this Antarctic fish and to provide  
56  
57 73 useful data for understanding Antarctic teleost divergence and evolution.  
58  
59  
60  
61  
62  
63  
64  
65

1 74

3 75 ***Library construction and sequencing***

6 76 *P. charcoti* (length: ~45 cm) were collected in nets at depths of 20–30 m in Marian Cove,  
7  
8 77 near King Sejong Station, on the Northern Antarctic Peninsula (62°14'S, 58°47'W) in January  
9  
10 78 2012 using the hook-and-line method (Fig. 1). High-molecular-weight genomic DNA was  
11  
12  
13 79 extracted from *P. charcoti* using the Gentra Puregene Blood Kit (Qiagen, Valencia, CA). For  
14  
15 80 genomic DNA sequencing, three paired-end libraries (PE300, PE400 and PE450) were  
16  
17  
18 81 constructed from sheared genomic DNA (consisting of 300, 400 and 450 bp fragments) and  
19  
20 82 subsequently prepared using standard Illumina sample preparation methods. Mate-pair  
21  
22  
23 83 libraries (MP3K, MP5K, MP8K and MP20K) were prepared for scaffolding, and sequencing  
24  
25 84 was performed according to the manufacturer's instructions (consisting of 3 kb, 5 kb, 8 kb  
26  
27  
28 85 and 20 kb fragments) (Illumina, San Diego, USA).

29 86

30  
31  
32  
33 87 **Table 1. *P. charcoti* sequencing statistics.**

| Library | Mode    | Insert size (bp) | Library type | Trimmed Reads | Trimmed sequence (bp) | Source      |
|---------|---------|------------------|--------------|---------------|-----------------------|-------------|
| PE300   | 2 x 300 | 300              | paired-end   | 28 776 064    | 4 964 428 226         | Genomic DNA |
| PE400   | 2 x 300 | 400              | paired-end   | 139 126 700   | 29 538 419 473        | Genomic DNA |
| PE450   | 2 x 300 | 450              | paired-end   | 85 834 292    | 16 644 575 781        | Genomic DNA |
| MP3K    | 2 x 300 | 3 000            | mate-pair    | 70 517 546    | 4 925 657 177         | Genomic DNA |
| MP5K    | 2 x 300 | 5 000            | mate-pair    | 66 623 428    | 4 626 486 038         | Genomic DNA |
| MP8K    | 2 x 300 | 8 000            | mate-pair    | 61 240 982    | 4 212 744 363         | Genomic DNA |
| MP20K   | 2 x 300 | 20 000           | mate-pair    | 86 575 644    | 5 387 730 972         | Genomic DNA |
| PE500   | 2 x 300 | 500              | paired-end   | 25 940 404    | 5 571 197 784         | Liver RNA   |

53 88

54  
55 89 Because expressed sequence tags are essential for gene annotation in draft genomes,  
56  
57  
58 90 transcriptome library was conducted using TruSeq® Sample Preparation v2 (Illumina) with  
59  
60  
61  
62  
63  
64  
65

1 91 total RNA. Total RNA were extracted from liver tissue and purified using the RNeasy Mini  
2  
3 92 Kit (Qiagen) with the RNase-Free DNaseI Kit (Qiagen). Extracted sample quality and  
4  
5  
6 93 concentration were determined with 2100 Bioanalyzer (Agilent Technologies, Santa Clara,  
7  
8 94 CA). mRNA was isolated from 2  $\mu$ g of the total RNA for double-stranded cDNA library  
9  
10  
11 95 construction with poly-A selection. For transcriptome sequencing, paired-end libraries  
12  
13 96 (PE500) were constructed from sheared cDNA consisting of 500 bp fragments and  
14  
15  
16 97 subsequently prepared using standard Illumina sample preparation methods. Final  
17  
18 98 transcriptome libraries length and concentration were determined with 2100 Bioanalyzer.  
19  
20  
21 99 Transcriptome libraries were sequenced using runs of 300 $\times$ 2 paired-end reads (Table 1).  
22  
23 100 All resulting Illumina reads were trimmed using the FASTX-Toolkit (ver. 0.0.11)  
24  
25 101 ([http://hannonlab.cshl.edu/fastx\\_toolkit](http://hannonlab.cshl.edu/fastx_toolkit)) with the parameters -t 20, -l 70 and -Q 33, after  
26  
27  
28 102 which a paired sequence from the trimmed Illumina reads was selected. All sequencing  
29  
30 103 processes for three paired-end libraries (genomic DNA), four mate-pair libraries (genomic  
31  
32  
33 104 DNA) and one paired-end libraries (transcriptome) were performed by Korea Polar Research  
34  
35 105 Institutes (data statistics provided in Table 1).  
36  
37  
38 106  
39

### 40 107 *Genome assembly*

41  
42 108 K-mer analysis was conducted using Jellyfish 2.2.5 (Jellyfish, RRID:SCR\_005491) [9] to  
43  
44  
45 109 estimate the genome size from DNA paired-end libraries. The estimated genome size is  
46  
47 110 805 Mb, with the main peak observed at a coverage depth of  $\sim$ 39x (Fig. 2). Initial assemblies  
48  
49  
50 111 were performed using the Celera Assembler ver. 8.3 (Celera Assembler, RRID:SCR\_010750)  
51  
52 112 with trimmed paired-end reads [10]. For the Celera Assembler, paired-end read data were  
53  
54  
55 113 converted into FRG file format using FastqToCA, which is a utility included in the Celera  
56  
57 114 Assembler. Assembly was performed on a 80-processor workstation using Intel Xeon X7460  
58  
59 115 2.66 GHz processors and 1 Tb RAM with the following parameters: overlapper = ovl,  
60  
61  
62  
63  
64  
65

1 116 unitigger = bogart, utgErrorRate = 0.03, utgErrorLimit = 2.5, utgGraphErrorRate = 0.030,  
2  
3 117 utgGraphErrorLimit = 3.25, ovlErrorRate = 0.06, cnsErrorRate = 0.06, cgwErrorRate = 0.1,  
4  
5 118 merSize = 28, doOverlapBasedTrimming = 1, merylMemory = 500000, merylThreads = 40,  
6  
7  
8 119 ovlMemory = 8 Gb, ovlThreads = 2, ovlConcurrency = 40, ovlHashBlockLength =  
9  
10 120 300000000, ovlRefBlockSize = 7630000, and ovlHashBits = 24. The initial assembly had a  
11  
12  
13 121 total size of 709 Mb, N50 contig length of 5,039 bp, and N50 scaffold length of 6,135 kb with  
14  
15  
16 122 a GC content of 40.66%. The assembled contig revealed a contig coverage of approximately  
17  
18 123 36.57x from Celera assembler. Contigs from the initial assembly were used for scaffolding  
19  
20  
21 124 using the stand-alone scaffolding tool SSPACE ver. 2.0 (SSPACE, RRID:SCR\_005056) with  
22  
23 125 the following parameters: -x 0, -k 3, -a 0.8, and -T 60 [11]. Trimmed mate-pair reads created  
24  
25 126 using the FASTX-Toolkit were used in the scaffolding process. After scaffolding, the number  
26  
27  
28 127 of scaffolds decreased from 153,398 to 12,381, and the N50 scaffold length increased from  
29  
30 128 6,135 to 166,726 bp (Table 2). The total size of the final scaffolds (~795 Mb) was consistent  
31  
32  
33 129 with the estimated genome size (805 Mb).

### 34 35 130 36 37 131 ***Gene annotation***

38 132 MAKER2 annotation pipeline (MAKER, RRID:SCR\_005309) was used for genome  
39  
40 133 annotation with default parameters [12]. It first identified repetitive elements using  
41  
42  
43 134 RepeatMasker ver. 3.3.0 (Repeat Masker, RRID:SCR\_012954) with a *de novo* repeat library  
44  
45  
46  
47 135 [13], which was constructed using RepeatModeler ver. 1.0.3 (RepeatModeler,  
48  
49  
50 136 RRID:SCR\_015027) [14] with the Rebase library (Ver. 20140131). The SNAP gene finder  
51  
52 137 [15] was selected to perform *ab initio* gene prediction from this masked genome sequence.  
53  
54  
55 138 Alignment of transcriptome assembly results using BLASTn and homologous protein  
56  
57 139 information from tBLASTx were considered for gene annotation as RNA and protein  
58  
59 140 evidence, respectively. Transcriptome assembly was performed by using the program CLC  
60  
61  
62  
63  
64  
65

1 141 Genomics Workbench 8.0 with default parameters, and sequencing reads from PE500 (Table  
2  
3 142 1) were used. Proteins from six species were used in the analysis: *Notothenia coriiceps*  
4  
5 143 (NCBI reference sequence NC\_015653.1) and *Danio rerio*, *Gasterosteus aculeatus*, *Takifugu*  
6  
7  
8 144 *rubripes*, *Tetraodon nigroviridis*, and *Gadus morhua* (all from Ensembl release 69).  
9  
10 145 MAKER2 includes integration of the Annotation Edit Distance (AED) metric for controlling  
11  
12 146 the quality of annotation [16]. AED values are bounded between 0 and 1, an AED value of 0  
13  
14 147 indicated that its aligned evidence and annotated gene showed an exact match. Conversely, a  
15  
16 148 value of 1 indicated no evidence support. But the AED cut-off was not applied for this gene  
17  
18 149 predictions. Instead, AED values were denoted in gene annotation and were considered for  
19  
20 150 orthologous gene analysis and gene gain and loss.  
21  
22 151 MAKER2 was used to select and revise the final gene model based on all inputs. A total of  
23  
24 152 32,712 genes were predicted in *P. charcoti* using MAKER2 (Table 2). The annotated genes  
25  
26 153 contained an average of eight exons, with an average mRNA length of 1,412 bp and CDS  
27  
28 154 length of 1,291 bp. The repeat prediction from MAKER2 showed that repeat sequences  
29  
30 155 accounted for 19.41% of the assembled *P. charcoti* genome.  
31  
32 156 To estimate genome assembly and annotation completeness, we performed BUSCO  
33  
34 157 (Benchmarking Universal Single-Copy Orthologs) analysis (BUSCO, RRID:SCR\_015008)  
35  
36 158 [17], an approach used for lineage-specific profile libraries, such as those of actinopterygii,  
37  
38 159 and identified 88.6% complete and 5.7% partial eukaryote orthologous gene sets in our  
39  
40 160 assembly (Table 3).  
41  
42 161 To assign preliminary functions for 32,712 genes, we used Blast2GO ver. 2.6.0 (Blast2GO,  
43  
44 162 RRID:SCR\_005828) [18]. We classified functions for 18,455 (56.42%) predicted genes,  
45  
46 163 which were annotated using BLASTp results and InterproScan (RRID:SCR\_005829). Gene  
47  
48 164 ontology (GO) annotation terms included “biological process” (20,126, 61.52%), “molecular  
49  
50 165 function” (20,514, 62.71%), and “cellular component” (15,452, 47.23%). Enzyme  
51  
52  
53  
54  
55  
56  
57  
58  
59  
60  
61  
62  
63  
64  
65

1 166 commission numbers were obtained for 3,846 proteins.

2  
3 167

4  
5  
6 168

7  
8 169 **Table 2. Global statistics of the *P. charcoti* genome assembly.**

|                              |                                | <i>P. charcoti</i> |
|------------------------------|--------------------------------|--------------------|
| Scaffold                     | Total scaffold length (bases)  | 794 596 176        |
|                              | Gap size (bases)               | 86 840 902         |
|                              | Scaffolds (n)                  | 12 602             |
|                              | N50 scaffold length (bases)    | 178 362            |
|                              | Max scaffold length (bases)    | 1 318 127          |
| Contig                       | Total contig length (bases)    | 709 540 340        |
|                              | Contigs (n)                    | 153 398            |
|                              | N50 contig length (bases)      | 6 145              |
|                              | Max contig length (bases)      | 65 864             |
| Annotation                   | Gene Number (n)                | 32 712             |
|                              | An average mRNA length (bases) | 1 412              |
|                              | An average CDS length (bases)  | 1 291              |
|                              | An average of exons (n)        | 8                  |
| Repeat content (% of genome) |                                | 19.4               |

36 170

37 171

38 172

39 173

**Table 3. Summarized benchmarks of the BUSCO (Benchmarking Universal Single-Copy Orthologs) assessment.**

|                             | Actinopterygii (%) |
|-----------------------------|--------------------|
| Total BUSCO groups searched | 4 062*             |
| Complete BUSCOs             | 88.6               |
| Complete and single-copy    | 86.3               |
| Complete and duplicated     | 2.3                |
| Partial                     | 5.7                |
| Missing                     | 5.7                |

53 174 \* Number of total BUSCO groups searched

54  
55 175

56  
57  
58 176 **Ortholog analysis**

59

60

61

62

63

64

65



1 177 We identified orthologous groups using OrthoMCL (ver. 2.0.5) [19], which generated a  
2  
3 178 graphical representation of the sequence relationships, which were then presented in  
4  
5  
6 179 subgraphs using the Markov Clustering Algorithm based on multiple eukaryotic genomes. We  
7  
8 180 used the standard parameters (percentMatchCutoff = 50 and evaluateExponentCutoff = -5) and  
9  
10  
11 181 options within OrthoMCL for all steps. We used seven fish genomes for this analysis (*D.*  
12  
13 182 *rerio*, *G. aculeatus*, *T. rubripes*, *T. nigroviridis*, *G. morhua*, *N. coriiceps*, and *P. charcoti*). The  
14  
15 183 coding sequences of five genomes were collected from Ensembl release 69, and one coding  
16  
17 184 sequence was selected among multiple proteins corresponding to one gene. We used the  
18  
19  
20 185 coding sequence from the NCBI reference sequence (NC\_015653.1) of *N. coriiceps* and three  
21  
22 186 groups of the coding sequence of *P. charcoti* from MAKER annotation with different AED  
23  
24 187 threshold (1, 0.75, and 0.25). In case of a AED cut-off value of 1, we identified 8,951  
25  
26 188 orthologous groups common to all seven fish; 288 of 32,636 *N. coriiceps* genes and 333 of  
27  
28 189 32,712 *P. charcoti* genes were not identified in any other species, and 2,519 groups were  
29  
30 190 identified only in the two Antarctic fish (Fig. 3A). When we applied a AED threshold of 0.25  
31  
32 191 against gene prediction of *P. charcoti*, 7,568 orthologous groups were identified.  
33  
34  
35  
36  
37  
38  
39

### 40 193 ***Likelihood analysis of gene gain and loss***

41  
42 194 We estimated differences in the size of orthologs to identify gene families that have  
43  
44 195 undergone significant size changes through evolution [20, 21]. We used the program  
45  
46 196 CAFE3.0 [22] and performed analyses against three groups including the coding sequence of  
47  
48 197 *P. charcoti* with different AED threshold separately. We performed phylogenetic analyses  
49  
50 198 among seven representative fishes with the protein-coding gene in the orthologous groups to  
51  
52 199 obtain the Newick description of a rooted and bifurcating phylogenetic tree. 8,951  
53  
54 200 orthologous gene sets were selected using the criterion of reciprocal best BLASTP hit and  
55  
56 201 were aligned using PRANK (Ver. 130820) under a codon model with the “-dna -codon”  
57  
58  
59  
60  
61  
62  
63  
64  
65

option [23], poor alignment sites were eliminated using Gblock (Ver. 0.91) under a codon model with the “-t = c” option [24]. The remaining alignment regions were concatenated, and used in the construction of the phylogenetic tree by using the neighbor-joining method in the MEGA (Ver. 6) program (MEGA, RRID:SCR\_000667) [25]. The ultrametric tree of the species with branch lengths in units of time were prepared by referring TimeTree [26] for CAFE3.0 (Fig. 3B). The program was performed using  $p < 0.05$ , and estimated rates of birth ( $\lambda$ ) and death ( $\mu$ ) were calculated using the program LambdaMu with the “-s” option. The number of gene gains and losses were calculated on each branch of the tree with the “-t” option. *P. charcoti* gained 937 and lost 1916 gene families (Fig. 3B).

The Antarctic dragonfish *P. charcoti* is a species in the sister lineage of icefishes [27-29] which is the only hemoglobinless vertebrates. The dragonfish (Bathydraconidae) and the icefish (Channichthyidae) were generally considered to be evolved from common notothenioid ancestor, which was characterized by decreased hematocrit and blood hemoglobin concentrations [30-34]. The dragonfish showed most similar patterns in these trends among red-blooded notothenioid taxa [34]. The globin complex of the dragonfish *P. charcoti* was hypothesized to be similar in length and organization to that of ancestral icefish prior to loss of functionality [35]. Along with the recently published *N. coriiceps* genome [36], the genome of *P. charcoti* will broaden our understanding of how Antarctic fish have evolved to survive in sub-zero temperatures, and might provide an important clue to understand the process of evolution to the hemoglobinless Antarctic fish and their distinct phenotypes (an increase of blood volume, low blood viscosity, large bore capillaries, increased vascularity with great capacitance, cardiomegaly, and high blood flow).

#### **Availability of supporting data**

The data for *P. charcoti* genome and transcriptome has been deposited in the Sequence Read Archive (SRA) as BioProjects PRJNA330735. Other supporting data, including annotations,

1 227 alignments and BUSCO results, are available in the *GigaScience* repository, GigaDB [37].

2  
3 228

#### 4 5 6 229 **Competing interests**

7  
8 230 The authors declare no competing interests.

9  
10  
11 231

#### 12 13 232 **Funding**

14  
15 233 This work was supported by a grant, entitled ‘Polar Genomics 101 Project (PE17080)’ funded  
16 234 by the Korea Polar Research Institute.

17  
18  
19  
20 235

#### 21 22 23 236 **Author contributions**

24  
25 237 H.P. and J.P. conceived and designed experiments and analyses. D. H. A., S.C.S., B.K., S.K.,

26  
27 238 J.K., I.A. and J.P. performed experiments and conducted bioinformatics. D. H. A., S.C.S.,

28  
29 239 B.K. and H.P. wrote the paper.

30  
31  
32 240

#### 33 34 35 241 **References**

36  
37 242  
38  
39  
40 243 1. Eastman JT, Pratt D, Winn W. *Antarctic fish biology: evolution in a unique environment*.  
41  
42 244 Academic Press San Diego; 1993.

43  
44  
45 245 2. Eastman JT, Clarke A. A comparison of adaptive radiations of Antarctic fish with those of  
46  
47 246 nonAntarctic fish. *Fishes of Antarctica*. Springer; 1998. p. 3-26.

48  
49  
50 247 3. Eastman JT. Antarctic notothenioid fishes as subjects for research in evolutionary biology.  
51  
52 248 *Antarctic Science*. 2000;**12**(3):276-87.

53  
54  
55 249 4. Eakin RR, Eastman JT, Near TJ. A new species and a molecular phylogenetic analysis of  
56  
57 250 the Antarctic fish genus *Pogonophryne* (Notothenioidei: Artedidraconidae). *Copeia*.  
58  
59 251 2009;**4**:705-13.

60  
61  
62  
63  
64  
65

- 1 252 5. Casaux R, Mazzotta A, Barrera-Oro E. Seasonal aspects of the biology and diet of  
2  
3 253 nearshore nototheniid fish at Potter Cove, South Shetland Islands, Antarctica. *Polar*  
4  
5 254 *Biology*. 1990;**11**(1):63-72.  
6  
7  
8 255 6. Barrera-Oro E. The role of fish in the Antarctic marine food web: differences between  
9  
10 256 inshore and offshore waters in the southern Scotia Arc and west Antarctic Peninsula.  
11  
12 257 *Antarctic Science*. 2002;**14**(4):293-309.  
13  
14  
15 258 7. Barrera-Oro E, Lagger C. Egg-guarding behaviour in the Antarctic bathydraconid  
16  
17 259 dragonfish *Parachaenichthys charcoti*. *Polar biology*. 2010;**33**(11):1585-7.  
18  
19  
20 260 8. Eastman JT, Sidell BD. Measurements of buoyancy for some Antarctic notothenioid fishes  
21  
22 261 from the South Shetland Islands. *Polar Biology*. 2002;**25**(10):753-60.  
23  
24  
25 262 9. Marçais G, Kingsford C. A fast, lock-free approach for efficient parallel counting of  
26  
27 263 occurrences of k-mers. *Bioinformatics*. 2011;**27**(6):764-70.  
28  
29  
30 264 10. Myers EW, Sutton GG, Delcher AL, Dew IM, Fasulo DP, Flanigan MJ, et al. A whole-  
31  
32 265 genome assembly of *Drosophila*. *Science*. 2000;**287**(5461):2196-204.  
33  
34  
35 266 11. Boetzer M, Henkel CV, Jansen HJ, Butler D, Pirovano W. Scaffolding pre-assembled  
36  
37 267 contigs using SSPACE. *Bioinformatics*. 2011;**27**(4):578-9.  
38  
39  
40 268 12. Cantarel BL, Korf I, Robb SM, Parra G, Ross E, Moore B, et al. MAKER: an easy-to-use  
41  
42 269 annotation pipeline designed for emerging model organism genomes. *Genome Research*.  
43  
44 270 2008;**18**(1):188-96.  
45  
46  
47 271 13. Tarailo-Graovac M, Chen N. Using RepeatMasker to identify repetitive elements in  
48  
49 272 genomic sequences. *Current Protocols in Bioinformatics*. 2009:4-10.  
50  
51  
52 273 14. Bao Z, Eddy SR. Automated de novo identification of repeat sequence families in  
53  
54 274 sequenced genomes. *Genome Research*. 2002;**12**(8):1269-76.  
55  
56  
57 275 15. Korf I. Gene finding in novel genomes. *BMC bioinformatics*. 2004;**5**(1):59.  
58  
59  
60 276 16. Holt C, Yandell M. MAKER2: an annotation pipeline and genome-database management  
61  
62  
63  
64  
65

- 1 277 tool for second-generation genome projects. *BMC bioinformatics*. 2011;**12**(1):491.  
2
- 3 278 17. Simão FA, Waterhouse RM, Ioannidis P, Kriventseva EV, Zdobnov EM. BUSCO:  
4  
5 assessing genome assembly and annotation completeness with single-copy orthologs.  
6 279  
7  
8 280 *Bioinformatics*. 2015:btv351.  
9
- 10 281 18. Conesa A, Gotz S, Garcia-Gomez JM, Terol J, Talon M, Robles M. Blast2GO: a universal  
11  
12 tool for annotation, visualization and analysis in functional genomics research.  
13 282  
14  
15 283 *Bioinformatics*. 2005;**21**(18):3674-6.  
16  
17
- 18 284 19. Li L, Stoeckert CJ, Jr., Roos DS. OrthoMCL: identification of ortholog groups for  
19  
20 285 eukaryotic genomes. *Genome Research*. 2003;**13**(9):2178-89.  
21  
22
- 23 286 20. Hahn MW, De Bie T, Stajich JE, Nguyen C, Cristianini N. Estimating the tempo and  
24  
25 287 mode of gene family evolution from comparative genomic data. *Genome Research*.  
26  
27 288 2005;**15**(8):1153-60.  
28  
29
- 30 289 21. Hahn MW, Han MV, Han S-G. Gene family evolution across 12 *Drosophila* genomes.  
31  
32 290 *PLoS Genetics*. 2007;**3**(11):e197.  
33  
34
- 35 291 22. De Bie T, Cristianini N, Demuth JP, Hahn MW. CAFE: a computational tool for the study  
36  
37 292 of gene family evolution. *Bioinformatics*. 2006;**22**(10):1269-71.  
38  
39
- 40 293 23. Loytynoja A, Goldman N. An algorithm for progressive multiple alignment of sequences  
41  
42 294 with insertions. *Proceedings of the National Academy of Sciences of the United States of*  
43  
44 295 *America*. 2005;**102**(30):10557-62.  
45  
46
- 47 296 24. Castresana J. Selection of conserved blocks from multiple alignments for their use in  
48  
49 297 phylogenetic analysis. *Molecular Biology and Evolution*. 2000;**17**(4):540-52.  
50  
51
- 52 298 25. Tamura K, Stecher G, Peterson D, Filipski A, Kumar S. MEGA6: molecular evolutionary  
53  
54 299 genetics analysis version 6.0. *Molecular Biology and Evolution*. 2013;**30**(12):2725-9.  
55  
56
- 57 300 26. Hedges SB, Dudley J, Kumar S. TimeTree: a public knowledge-base of divergence times  
58  
59 301 among organisms. *Bioinformatics*. 2006;**22**(23):2971-2.  
60  
61  
62  
63  
64  
65

- 1 302 27. Balushkin A, Voskoboynikova O. Systematics and phylogeny of antarctic dragonfishes  
2  
3 303 (Bathydraconidae, Notothenioidei, Perciformes). *Journal of ichthyology*. 1995;**35**(5):89-  
4  
5 304 104.  
6  
7  
8 305 28. Derome N, Chen W-J, Dettai A, Bonillo C, Lecointre G. Phylogeny of Antarctic  
9  
10 306 dragonfishes (Bathydraconidae, Notothenioidei, Teleostei) and related families based on  
11  
12 307 their anatomy and two mitochondrial genes. *Molecular phylogenetics and evolution*.  
13  
14 308 2002;**24**(1):139-52.  
15  
16  
17  
18 309 29. Near TJ, Parker SK, Detrich HW. A genomic fossil reveals key steps in hemoglobin loss  
19  
20 310 by the antarctic icefishes. *Molecular biology and evolution*. 2006;**23**(11):2008-16.  
21  
22  
23 311 30. Bargelloni L, Marcato S, Patarnello T. Antarctic fish hemoglobins: evidence for adaptive  
24  
25 312 evolution at subzero temperature. *Proceedings of the National Academy of Sciences*.  
26  
27 313 1998;**95**(15):8670-5.  
28  
29  
30 314 31. Beers JM, Borley KA, Sidell BD. Relationship among circulating hemoglobin, nitric  
31  
32 315 oxide synthase activities and angiogenic poise in red-and white-blooded Antarctic  
33  
34 316 notothenioid fishes. *Comparative Biochemistry and Physiology Part A: Molecular &*  
35  
36 317 *Integrative Physiology*. 2010;**156**(4):422-9.  
37  
38  
39  
40 318 32. D'Avino R, Di Prisco G. Antarctic fish hemoglobin: an outline of the molecular structure  
41  
42 319 and oxygen binding properties—I. Molecular structure. *Comparative Biochemistry and*  
43  
44 320 *Physiology Part B: Comparative Biochemistry*. 1988;**90**(3):579-84.  
45  
46  
47 321 33. Di Prisco G. Molecular adaptations of Antarctic fish hemoglobins. *Fishes of Antarctica:*  
48  
49 322 Springer; 1998. p. 339-53.  
50  
51  
52 323 34. Kunzmann A, Caruso C, di Prisco G. Haematological studies on a high-Antarctic fish:  
53  
54 324 Bathhydraco marri Norman. *Journal of experimental marine biology and ecology*.  
55  
56 325 1991;**152**(2):243-55.  
57  
58  
59 326 35. Lau YT, Parker SK, Near TJ, Detrich HW, 3rd. Evolution and function of the globin  
60  
61  
62  
63  
64  
65

1 327 intergenic regulatory regions of the antarctic dragonfishes (Notothenioidei:  
2  
3 328 Bathydraconidae). *Molecular biology and evolution*. 2012;**29**(3):1071-80.

4  
5  
6 329 36. Shin SC, Ahn DH, Kim SJ, Pyo CW, Lee H, Kim MK, et al. The genome sequence of the  
7  
8 330 Antarctic bullhead notothen reveals evolutionary adaptations to a cold environment.  
9  
10 331 *Genome Biology*. 2014;**15**(9):468.

11  
12  
13  
14 332 37. Ahn DH, Shin SC, Kim BM, Kang S, Kim JH, Ahn I, Park J, Park H. Supporting data for  
15  
16 333 “Draft genome of the Antarctic dragonfish, *Parachaenichthys charcoti*”. GigaScience  
17  
18 334 Database. 2017. <http://dx.doi.org/10.5524/100321>

19  
20  
21  
22 335  
23  
24 336 **Figure Legends**

25  
26 337  
27 338  
28  
29 339 **Figure 1. Photograph of Antarctic dragonfish, *P. charcoti*.**

30 340  
31 341  
32 342 **Figure 2. Estimation of the *P. charcoti* genome size based on 39-mer analysis.** X-axis  
33  
34  
35 343 represents the depth (peak at 39×) and the y-axis represents the proportion. Genome size was  
36  
37 344 estimated to be 805 Mb (total k-mer number/volume peak).

38  
39  
40 345  
41 346 **Figure 3. Comparative genome analyses of the *P. charcoti* genome.**

42  
43  
44 347 A. Venn diagram of orthologous gene clusters between four arthropod lineages. B. Gene  
45  
46 348 family gain-and-loss analysis. The number of gained gene families and lost gene families are  
47  
48 349 indicated for each species. Time lines specify divergence times between the lineages.

50  
51 350  
52  
53  
54  
55  
56  
57  
58  
59  
60  
61  
62  
63  
64  
65

A

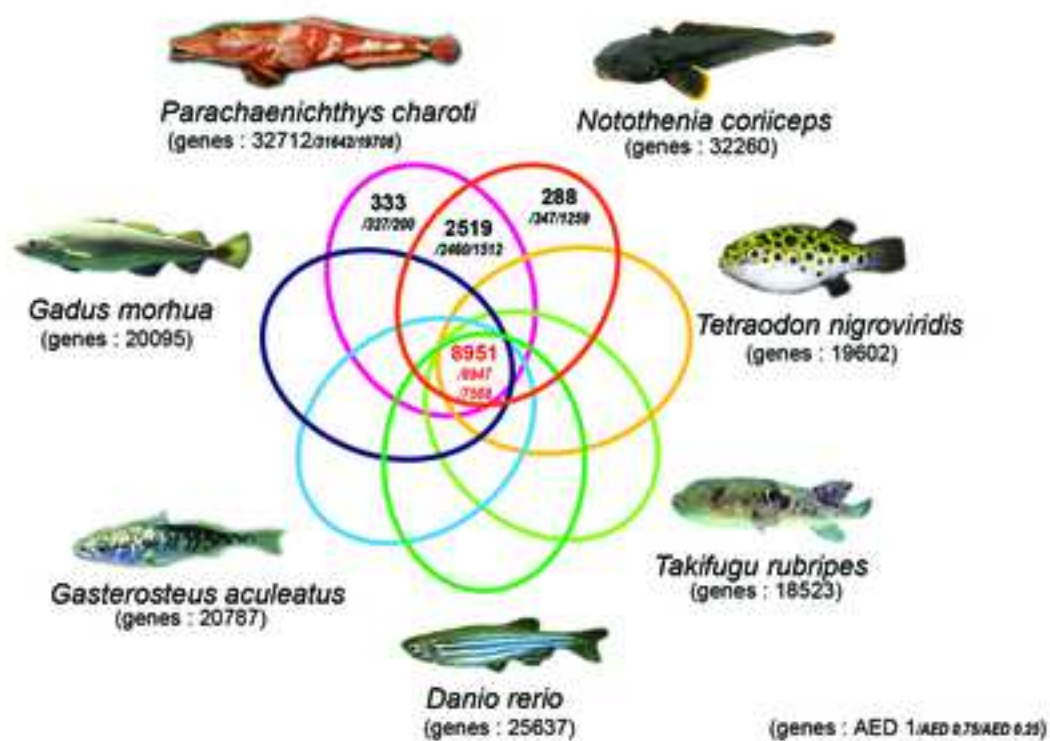

B

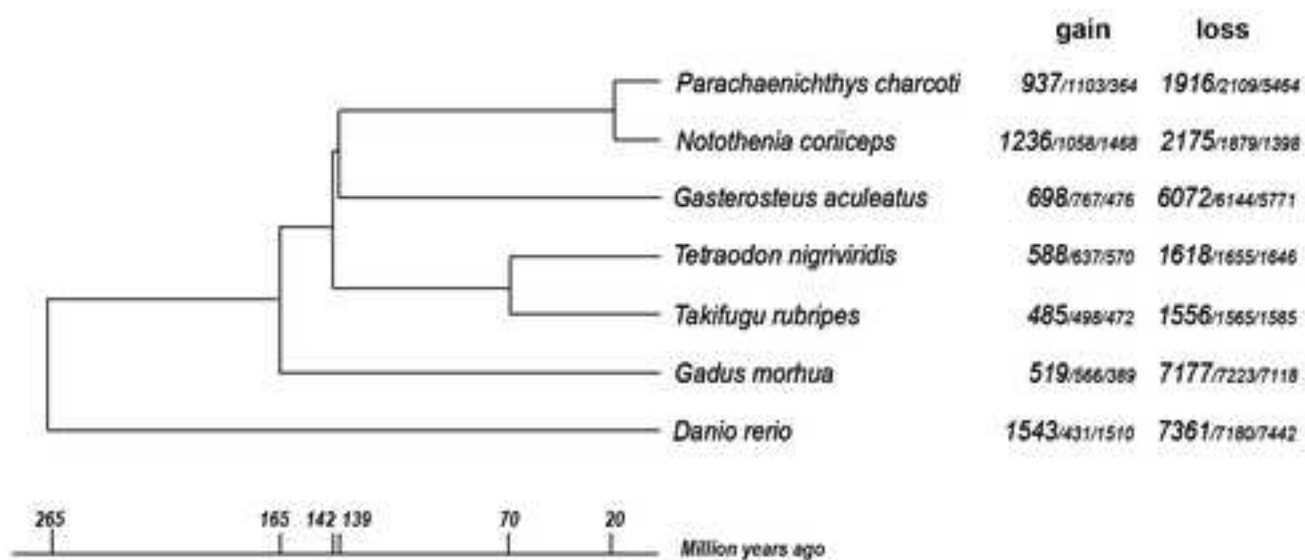



1 Reviewer reports:

2

3 Reviewer #1: The manuscript "Draft genome of the Antarctic dragonfish, *Parachaenichthys charcoti*" is  
4 another important contribution to the scientific community working on comparative teleost genomics.  
5 As with similar studies, this manuscript appears to be submitted with the purpose of releasing this  
6 valuable dataset to the public, and holds no claim to solve any specific scientific question, but rather  
7 put up possibilities for the future use of this dataset.

8

9 ### Major comments

10

11 The authors have made a good attempt to conduct thorough sequencing of the Antarctic dragonfish  
12 genome, using several paired-end and mate-pair libraries. However, the results, and especially the N50  
13 contig statistic is far below what this reviewer would expected using Celera Assembler (CA) with the  
14 sequencing data presented. This reviewer is curious to why this specific sequencing method was applied  
15 (i.e three very similar libraries for PE sequencing and 2x300bp).

16

17 [Author's response:](#)

18 [We planned to assemble sequencing reads into contigs using various assembler programs from the same  
19 sequencing libraries: Abyss, ALLPATHS-LG, SOAPdenovo, and Celera assembler were used as  
20 assemblers in this study. In case of ALLPATHS-LG, paired-end reads should be merged into single read  
21 to assemble using higher k-mer. So, we designed the length of libraries to be shorter than 500 bases.  
22 The longer reads were known to be favorable in assemblies using \*de Bruijn\* graph methods and overlap-  
23 layout-consensus methods. So sequencing libraries were sequenced with 2x300bp mode using Illumine  
24 MiSeq.](#)

25

26 For all the paired-end libraries the inserts are shorter than the sequencing output, which appears to be  
27 quite wasted as the trimmed reads are only 173-212bp on average for these libraries. Would it not have  
28 been better to have libraries with an insert size around 700-800bp? This would surely span many more  
29 of the repetitive sequences now causing gaps and low continuity. Also, as trimming is part of the CA  
30 pipeline, why trim the reads prior to running CA? Additionally, FLASH should have been applied to  
31 merge overlapping reads from the paired-end sequencing libraries prior to assembly.

32

33 [Author's response:](#)

34 [As reviewer's comments, if libraries with an insert size around 700-800bp were used, the assembly  
35 statistics would be better from Celera assembler. But we were greedy to create libraries that meets all  
36 conditions in assemblers and construct libraries with the an insert size up to 500bp to be merged.](#)

37 In Celera assembler, windows below average quality value of 12 are trimmed as default. We wanted to  
38 use only sequencing reads with high quality in assemblies with Celera assembler and other assemblers  
39 using *de Bruijn* graph, and trimmed the bases with a low quality score < 20 from 3'-end of reads. After  
40 that, the reads shorter than 70 in length were also discarded, and the resulting high quality reads were  
41 used in all assemblies. The use of FLASH is a good suggestion and we will apply it later to improve the  
42 genome assembly.

43

44 The authors have also made a fair attempt to annotate this *P. charcoti* draft genome using the MAKER  
45 pipeline, and I'm happy to see that effort has been put into RNA sequencing to improve this analysis.  
46 However, some shortcuts have been taken in regard to how the annotation was performed. For instance,  
47 it is now standard procedure to produce a species specific repeat library, using RepeatModler to aid in  
48 the annotation. This was not done. The authors also fail to inform which library that was used for  
49 identifying repetitive elements with RepeatMasker. It is also customary to include SNAP, AUGUSTUS  
50 and GENEFINDER runs as part of the MAKER pipeline to improve gene prediction. This reviewer  
51 cannot see that this has been included in the annotation pipeline, which might explain why the number  
52 of predicted genes is so high. I'm also missing information regarding which AED cut-off that was used  
53 for the final gene predictions.

54

55 Author's response:

56 We used *de novo* repeat library to identify repetitive elements using RepeatMasker, and the *de novo*  
57 repeat library were produced using repeatModeler with the Repbase library (Ver. 20140131). We also  
58 selected the SNAP in MAKER annotation pipeline. Because predicted genes with AED score less than  
59 0.75 were about 3%, we used 1 as AED cut-off values for the final gene predictions. The number of  
60 genes with AED value below 0.75 and below 0.25 was 31,642 and 19,708, respectively. We remained  
61 the gene with high AED value for manual review, added AED value into the file called  
62 "Blast2Go\_annotation\_with\_AED.tab" in GigaDB, and we changed manuscript as follows:

63 "MAKER2 annotation pipeline was used for genome annotation with default parameters [12]. It first  
64 identified repetitive elements using RepeatMasker (ver. 3.3.0) with a *de novo* repeat library [13], which  
65 was constructed using RepeatModeler (Ver. 1.0.3) [14] with the Repbase library (Ver. 20140131). The  
66 SNAP gene finder [15] was selected to perform ab initio gene prediction from this masked genome  
67 sequence. Alignment of transcriptome assembly results using BLASTn and homologous protein  
68 information from tBLASTx were considered for gene annotation as RNA and protein evidence,  
69 respectively. Transcriptome assembly was performed by using the program CLC Genomics Workbench  
70 8.0 with default parameters, and sequencing reads from PE500 (Table 1) were used. Proteins from six  
71 species were used in the analysis: *Notothenia coriiceps* (NCBI reference sequence NC\_015653.1) and  
72 *Danio rerio*, *Gasterosteus aculeatus*, *Takifugu rubripes*, *Tetraodon nigroviridis*, and *Gadus morhua* (all

73 from Ensembl release 69). MAKER2 include integration of the Annotation Edit Distance (AED) metric  
74 for controlling the quality of annotation [16]. AED values are bounded between 0 and 1, an AED value  
75 of 0 indicated that its aligned evidence and annotated gene showed an exact match, Conversely, a value  
76 of 1 indicated no evidence support. But the AED cut-off was not applied for this gene predictions.  
77 Instead, AED values were denoted in gene annotation and were considered for orthologous gene  
78 analysis and gene gain and loss.”

79

80 The authors have further investigated the gene space completeness using BUSCO, which is good.  
81 However, there is reasons to believe that the gene sets reported are not up to date, especially since there  
82 is now a Actinopterygii specific gene set available ([http://busco.ezlab.org/frame\\_meta.html](http://busco.ezlab.org/frame_meta.html)). This  
83 should be quick to run and the results can easily be implemented in Table 3.

84

85 *Author’s response:*

86 We did re-run BUSCO analysis to the Actinopterygii DB, and changed Table 3 with new results as  
87 reviewer’s comments.

88

89 In an attempt to conduct comparative genomics, the authors have grouped orthologous genes from  
90 several species into orthologous groups using OrthoMCL. This is an OK starting point for a comparative  
91 analysis, however, their analysis is based on unfiltered data for the ENSEMBLE (which is know to  
92 include thousands of duplicates and Gene ID's without any sequence data available). For instance,  
93 would 24,460 genes be a much more adequate dataset to use for the zebrafish. It also included all of the  
94 32,712 *P. charcoti* gene predictions, which leads me to believe that most of the 333 othologous groups  
95 (according to Figure 3a, yet referred to as 333 genes" in the text) contain false positives and/or repeats.  
96 Based on these results, the authors also produce a "gain-and-loss" figure for the investigated species,  
97 yet there is no mentioning on how this analysis was performed.

98

99 *Author’s response:*

100 We filtered the data from the ENSEMBLE, we selected one gene among transcript variants, and  
101 discarded the gene without any sequence data available. Then, we have grouped orthologous genes with  
102 filtered data into orthologous groups. 25,637 zebra fish gene were used in this analysis, and the number  
103 of filtered genes for the ENSEMBLE were indicated in Figure 3A. We did not filtered the 32,712 *P.*  
104 *charcoti* gene predictions completely. Instead, we performed the analysis with the genes corresponding  
105 to the three conditions (AED cut-off;1, 0.75, 0.25) and the results corresponding to each case were  
106 shown in Figure 3A and 3B. The method producing a “gain-and-loss” was added to manuscript. We  
107 also changed the manuscripts as follow:

108 “*Likelihood analysis of gene gain and loss*

109 We estimated differences in the size of orthologs to identify gene families that have undergone  
110 significant size changes through evolution [20, 21]. We used the program CAFE3.0 [22] and performed  
111 analyses against three groups including the coding sequence of *P. charcoti* with different AED threshold  
112 separately. We performed phylogenetic analyses among seven representative fishes with the protein-  
113 coding gene in the orthologous groups to obtain the Newick description of a rooted and bifurcating  
114 phylogenetic tree. 8,951 orthologous gene sets were selected using the criterion of reciprocal best  
115 BLASTP hit and were aligned using PRANK (Ver. 130820) under a codon model with the “-dna -codon”  
116 option [23], poor alignment sites were eliminated using Gblock (Ver. 0.91) under a codon model with  
117 the “-t = c” option [24]. The remaining alignment regions were concatenated, and used in the  
118 construction of the phylogenetic tree by using the neighbor-joining method {Saitou, 1987 #51} in the  
119 MEGA (Ver. 6) program [25]. The ultrametric tree of the species with branch lengths in units of time  
120 were prepared by referring TimeTree [26] for CAFE3.0 (Figure 3B). The program was performed using  
121  $p < 0.05$ , and estimated rates of birth ( $\lambda$ ) and death ( $\mu$ ) were calculated using the program LambdaMu  
122 with the “-s” option. The number of gene gains and losses were calculated on each branch of the tree  
123 with the “-t” option. *P. charcoti* gained 937 and lost 1916 gene families (Figure 3B).”

124

125 Finally, the authors also present analyses based on (crude) Gene Ontology analyses which offer little  
126 scientific value. The entire paragraph on GO enrichment testing (including the results) is not very  
127 interesting. So, unless there is any biological meaning applied to the genes or pathways identified, this  
128 could/should be removed.

129

130 Author’s response:

131 We removed the paragraph and tables for the gene ontology analyses according to reviewer’s suggestion.

132

133 ### Minor comments

134

135 i) Please use an appropriate "thousands separator" for all values across the manuscript

136

137 Content were corrected: content of Table 1-3.

138

139 ii) Please make sure that the genus name is not spelled out several times.

140

141 Content were corrected: *Parachaenichthys charcoti* to *P. charcoti*

142

143 iii) Exchange "illumine" for "Illumina" prior to Table 1

144

145 Modification of content: "illumine" to (Illumina, San Diego, USA)

146

147 Reviewer #2: Review of Manuscript GIGA-D-17-00041

148

149 Overview

150

151 Hyun Park's group present the first genome sequence for *Parachaenichthys charcoti*, a member of the  
152 bathydraconid (Antarctic dragonfish) clade of the notothenioid group of Antarctic teleosts. This is the  
153 second notothenioid genome to be made publically available, following the publication of the Antarctic  
154 bullhead *Notothenia coriiceps* (Shin SC et al. *Genome Biology*. 2014;15:468). As a fish biologist  
155 interested in physiological evolution, the availability of multiple notothenioid genomes presents a great  
156 opportunity for deciphering the genomic basis of adaptive/non-adaptive changes made possible by the  
157 extreme cold environment and unusual evolutionary history linked to the notothenioid radiation. As a  
158 resource, the *P. charcoti* genome will be used for comparative analyses with *N. coriiceps* and other  
159 teleost genomes. I am particularly excited about the eventual publication of a genome for an Antarctic  
160 icefish species (*Channichthyidae*), for which the most extreme physiological traits linked to cold  
161 conditions are observed (e.g. total loss of haemoglobin). The genomes of *N. coriiceps* and *P. charcoti*  
162 will be crucial for such comparative analyses. It is important to note that the Antarctic dragonfishes and  
163 *Notothenia* lineages are relatively distant, so the availability of both genome sequences allows both  
164 shared-ancestral and lineage-specific changes or adaptations to be disentangled. Moreover, these  
165 genomes are generally important in the context of understanding the physiological capacity of  
166 notothenioids - key to the overall fauna of Antarctica - to respond to contemporary changes in climate.  
167 The manuscript is generally well written.

168

169 Thus, overall, I support the publication of this Data Note in GigaScience and I think the paper will  
170 encourage the uptake of the *P. charcoti* genome for a range of physiological and evolutionary questions.  
171 The data provided by the authors is generally comprehensive and relevant. I offer a number of  
172 comments/suggestions, aiming to either increase the clarity surrounding the manuscript's organization  
173 and the data and its applications, or requesting more details on aspects of the methodology. I split my  
174 comments into general suggestions and a larger set of minor points, the latter linked to particular text  
175 in the paper.

176

177 General suggestions

178

179 1. The authors might consider adding an informative heading to the first paragraph of the Data  
180 Description section, such as 'Context' or "Background". This would increase the clarity of the  
181 manuscript's organization.

182

183 Author's response:

184 We added "Introduction" as an informative heading.

185

186 2. I suggest that authors include an additional dedicated section at the end of the manuscript along the  
187 lines of the "Re-use potential" subheading suggested in the Journal guidelines. At the moment, the paper  
188 does not do a very proficient job in helping the reader envisage specific uses for the Data Set presented.  
189 Hence, in current form, the wider interest of the data set is not fully justified. I would like to see  
190 elaboration of the author's stance concerning data re-use, which I feel is necessary to meet the Journal's  
191 aim to "contextualize exceptional datasets to encourage reuse". This could provide more context in light  
192 of the findings of Shin et al. 2014 (e.g. the new *P. charcoti* genome will allow questions such as, which  
193 genomic traits are ancestral to all notothenioids? Which are lineage-specific? Which evolved by  
194 convergence? etc.), or give more context on interesting physiological traits observed in notothenioids  
195 for which researchers are seeking to clarify the underlying genomic basis.

196

197 Author's response:

198 We added an additional section at the end of the manuscript to satisfy for "Re-use potential" as follow:  
199 "The Antarctic dragonfish *P. charcoti* is a species in the sister lineage of icefishes [27-29] which is the  
200 only hemoglobinless vertebrates. The dragonfish (Bathyaconidae) and the icefish (Channichthyidae)  
201 were generally considered to be evolved from common notothenioid ancestor, which was characterized  
202 by decreased hematocrit and blood hemoglobin concentrations [30-34]. The dragonfish showed most  
203 similar patterns in these trends among red-blooded notothenioid taxa [34]. The globin complex of the  
204 dragonfish *P. charcoti* was hypothesized to be similar in length and organization to that of ancestral  
205 icefish prior to loss of functionality [35]. Along with the recently published *N. coriiceps* genome [36],  
206 the genome of *P. charcoti* will broaden our understanding of how Antarctic fish have evolved to survive  
207 in sub-zero temperatures, and might provide an important clue to understand the process of evolution  
208 to the hemoglobinless Antarctic fish and their distinct phenotypes (an increase of blood volume, low  
209 blood viscosity, large bore capillaries, increased vascularity with great capacitance, cardiomegaly, and  
210 high blood flow). "

211

212 3. I find the GO analyses to have tangential relevance as a dataset of meaningful future use, unless it is  
213 dissected considerably more than presented within this Data Note, where it appears much as a 'bolt-on'.  
214 The biological meaning of data presented in Table 4 (overrepresented GO terms in *P. charcoti*) does not  
215 add much insight to fuel on-going research. The data in Table 5 may be misleading in terms of its  
216 potential meaning for notothenioid-specific evolution, since the gene list was defined on the basis of  
217 comparing two notothenioids with stickleback as the next nearest phylogenetic lineage. As tens of  
218 millions of years separate notothenioids and stickleback, it is impossible to say the genes are restricted

219 to notothenioids. This is a minor point, but for me, the paper would be clearer without the GO analyses.

220

221 **Author's response:**

222 We removed the paragraph and tables for the gene ontology analyses according to reviewer's suggestion.

223

224 4. The authors should use species abbreviations consistently throughout the manuscript, which is not  
225 the case currently.

226

227 **Author's response:**

228 We corrected species abbreviation throughout the manuscript.

229

230 5. The authors used Celera to assemble the paired end MiSeq reads. As this is an OLC assembler, I  
231 would not have naturally considered this to be an optimal approach using relatively short read lengths  
232 provided by MiSeq. However, the authors provide evidence that a reasonable draft genome and  
233 annotation was nonetheless generated. I am intrigued, in a comparative sense, to know how the same  
234 data would have performed using the best-performing assemblers built on the de Bruijn Graph approach.  
235 Did the authors attempt any such assemblies, and if so, why did they eventually choose to go with the  
236 Celera assembly? To clarify, I am not requesting this as a necessary revision, though if the authors had  
237 some available data, I feel it would be of wider interest to contrast the performance of different  
238 assemblers.

239

240 **Author's response:**

241 We assembled sequencing reads into contigs using various assembler from the same sequencing  
242 libraries: Abyss, ALLPATHS-LG, SOAPdenovo, and Celera assembler. The assembly statistics from  
243 Celera assembler were best among assemblers.

|          | <i>P. charcoti</i>            | CA 8.3      | Abyss 2.0.2   | SOAPdenovo2   | Allpath-LG  |
|----------|-------------------------------|-------------|---------------|---------------|-------------|
| Scaffold | Total scaffold length (bases) | 794 596 176 | 1 460 857 469 | 1,130,003,516 | 685,815,544 |
|          | Gap size (bases)              | 86 840 902  | 385 080 136   | 529,475,795   | 172,038,706 |
|          | Scaffolds (n)                 | 12 602      | 5 921 399     | 785,432       | 29,613      |
|          | N50 scaffold length (bases)   | 178 362     | 10 786        | 50,086        | 74,560      |
|          | Max scaffold length (bases)   | 1 318 127   | 993 314       | 691,673       | 716,090     |
| Contig   | Total contig length (bases)   | 709,540,340 | 1,076,189,796 | 607,268,662   | 529,876,330 |
|          | Contigs (n)                   | 153,398     | 6,198,487     | 2,431,352     | 139,649     |
|          | N50 contig length (bases)     | 6,145       | 279           | 313           | 6,067       |
|          | Max contig length (bases)     | 65,864      | 32,177        | 3,493         | 67,562      |



|                                 |                                        |        |      |      |    |
|---------------------------------|----------------------------------------|--------|------|------|----|
| Gene Number<br>(n)              |                                        | 32,712 |      |      |    |
| Repeat content<br>(% of genome) |                                        | 19.4   |      |      |    |
| BUSCO                           | Complete BUSCOs (%)                    | 88.6   | 75.9 | 78.9 | 65 |
|                                 | Complete and single-copy<br>BUSCOs (%) | 86.3   | 74   | 76.9 | 64 |
|                                 | Complete and duplicated<br>BUSCOs (%)  | 2.3    | 1.9  | 2    | 2  |
|                                 | Fragmented BUSCOs (%)                  | 5.7    | 13.3 | 9.4  | 18 |
|                                 | Missing BUSCOs (%)                     | 5.7    | 10.8 | 11.7 | 17 |
|                                 | Total BUSCO groups<br>searched (n)     | 4 584* |      |      |    |

\* Total number of Actinopterygii database

244

245

246 Specific minor points

247

248 1. Abstract: "... and *P. charcoti* has undergone molecular and ecological diversification to survive in  
249 this cold environment". The wording here can be misconstrued, as the same statement is true for the  
250 wider notothenioid lineage. Better to write "... and all notothenioids have undergone molecular and  
251 ecological diversification to survive in this cold environment.

252

253 **Modification of content:**

254 **Notothenioids dominate Antarctic fish, making up 90% biomass and all notothenioids have undergone**  
255 **molecular and ecological diversification to survive in this cold environment.**

256

257 2. "However, little is known about the biology of this species, except that globin intergenic regulatory  
258 regions play a role in its low levels of alpha-globin expression". I found this sentence a little  
259 disappointing as an upfront motivation for the Data. I feel the abstract could more strongly communicate  
260 the importance of the target species for our comparative understanding of evolution in Antarctic fish.  
261 Which genomic traits are ancestral to notothenioids, which are lineage-specific, which evolved by  
262 convergence, etc.? I suspect these are the motivating questions and in my opinion, the paper would be  
263 stronger if this came through more strongly generally, including the abstract.

264

265 **Modification of content:**

266 **Therefore, they (notothenioids) are considered an attractive Antarctic fish model for evolutionary and**  
267 **ancestral genomic studies. Bathydraconidae is a speciose family of the Notothenioidei, the dominant**  
268 **taxonomic component of Antarctic teleosts. To understand the process of evolution of Antarctic fish,**  
269 **we select a typical Antarctic bathydraconid dragonfish, *P. charcoti*.**

270

271 3. Keywords: the authors might consider elaborating this list, for example to include mention of a  
272 genome assembly. Currently the keyword list could be linked to almost any field where Antarctic fish  
273 are studied, so it should better represent a genome biology paper.

274

275 [Modification of content:](#)

276 [Keywords: \*Parachaenichthys charcoti\*, Antarctic dragonfish, Notothenioid, \*De novo\* genome assembly,](#)  
277 [Genome annotation.](#)

278

279 4. Data description paragraph 1: "Antarctic notothenioid teleosts have evolved to adapt to the extreme  
280 Antarctic marine environment. The fish fauna of the Southern Ocean is dominated by a single lineage  
281 belonging to the perciform suborder Notothenioidei, consisting of 132 species and 8 families. They  
282 survive in the extreme Antarctic marine environment, which includes large seasonal changes in food  
283 availability and cold ocean water.

284 These first few sentences have an issue with the flow of information, which jumps about abruptly, as if  
285 thrown together. Consider a reformulation: "The fish fauna of the Southern Ocean is dominated by a  
286 single lineage belonging to the perciform suborder Notothenioidei, consisting of 132 species and 8  
287 families. All Antarctic notothenioids have evolved to adapt to the extreme Antarctic marine  
288 environment, which includes large seasonal changes in food availability and stably cold water  
289 temperature."

290

291 [Modification of content:](#)

292 [The fish fauna of the Southern Ocean is dominated by a single lineage belonging to the perciform](#)  
293 [suborder Notothenioidei, consisting of 132 species and 8 families. All Antarctic notothenioids have](#)  
294 [evolved to adapt to the extreme Antarctic marine environment, which includes large seasonal changes](#)  
295 [in food availability and stably cold water temperature.](#)

296

297 5. Data description paragraph 1: "Nototheniidae is the most speciose family of the Notothenioidei, the  
298 dominant taxonomic component of Antarctic teleosts, making up 90% of the fish biomass of the  
299 continental shelf and upper slope [1-4]. *Parachaenichthys charcoti*, the Antarctic bathydraconid  
300 dragonfish, was first described by Vaillant in 1906".

301 I find the construction of these sentences to be unusual - when first reading the information, the  
302 implication I got was that *P. charcoti* is a member of Nototheniidae, which is not the case. Can the  
303 authors please address the construction of the text to improve the clarity of the information?

304

305 [Modification of content:](#)

306 Notothenioids dominate Antarctic fish, making up 90% biomass and all notothenioids have undergone  
307 molecular and ecological diversification to survive in this cold environment. Therefore, they are  
308 considered an attractive Antarctic fish model for evolutionary and ancestral genomic studies.  
309 Bathydraconidae is a speciose family of the Notothenioidei, the dominant taxonomic component of  
310 Antarctic teleosts [1-4]. *Parachaenichthys charcoti*, the Antarctic bathydraconid dragonfish, was first  
311 described by Vaillant in 1906 (Notothenioidei: Bathydraconidae) (AphiaID: 234687; Fishbase ID:  
312 7102).

313  
314

315 6. Page 4, "All sequencing .... (Table 1)", would read more clearly as "All sequencing .... (data statistics  
316 provided in Table 1)". In the current form, the table citation is not clearly linked to the provided text  
317 about 'sequencing processes'.

318

319 Content were corrected:

320 For genomic DNA sequencing, three paired-end libraries (PE300, PE400 and PE450) were constructed  
321 from sheared genomic DNA (consisting of 300, 400 and 450 bp fragments) and subsequently prepared  
322 using standard Illumina sample preparation methods. Mate-pair libraries (MP3K, MP5K, MP8K and  
323 MP20K) were prepared for scaffolding, and sequencing was performed according to the manufacturer's  
324 instructions (consisting of 3 kb, 5 kb, 8 kb and 20 kb fragments) (Illumina, San Diego, USA).

325 Because expressed sequence tags are essential for gene annotation in draft genomes, transcriptome  
326 library was conducted using TruSeq® Sample Preparation v2 (Illumina) with total RNA. Total RNA  
327 were extracted from liver tissue and purified using the RNeasy Mini Kit (Qiagen) with the RNase-Free  
328 DNaseI Kit (Qiagen). Extracted sample quality and concentration were determined with 2100  
329 Bioanalyzer (Agilent Technologies, Santa Clara, CA). mRNA was isolated from 2 µg of the total RNA  
330 for double-stranded cDNA library construction with poly-A selection. For transcriptome sequencing,  
331 paired-end libraries (PE500) were constructed from sheared cDNA consisting of 500 bp fragments and  
332 subsequently prepared using standard Illumina sample preparation methods. Final transcriptome  
333 libraries length and concentration were determined with 2100 Bioanalyzer. Transcriptome libraries were  
334 sequenced using runs of 300×2 paired-end reads (Table 1).

335 All resulting Illumina reads were trimmed using the FASTX-Toolkit (ver. 0.0.11)  
336 ([http://hannonlab.cshl.edu/fastx\\_toolkit](http://hannonlab.cshl.edu/fastx_toolkit)) with the parameters -t 20, -l 70 and -Q 33, after which a paired  
337 sequence from the trimmed Illumina reads was selected. All sequencing processes for three paired-end  
338 libraries (genomic DNA), four mate-pair libraries (genomic DNA) and one paired-end libraries  
339 (transcriptome) were performed by Korea Polar Research Institutes (data statistics provided in Table 1).

340

341 7. Page 4, "illumine, Carlsbad, USA". Please correct the typo.

342  
343  
344  
345  
346  
347  
348  
349  
350  
351  
352  
353  
354  
355  
356  
357  
358  
359  
360  
361  
362  
363  
364  
365  
366  
367  
368  
369  
370  
371  
372  
373  
374  
375  
376  
377

Content were corrected:

"illumine, Carlsbad, USA" to "Illumina, San Diego, USA"

8. Page 4, "Finally, paired-end trimmed reads data with 73-fold coverage were obtained (Table 1). How was the fold-coverage estimated in this case? Also, why present coverage just for the paired-end libraries and not the mate pair libraries?"

Author's response:

We divided the sum of paired-end trimmed sequence by the predicted genome size to calculate the fold-coverage. Because the mate-pair libraries were used only in scaffolding, we did not considered it as coverage. But this sentence was not informative. So we deleted this sentence.

9. Page 5: "The assembled contig revealed a contig coverage of approximately 36.57x". By what approach was this assessed?"

Author's response:

A contig coverage were calculated by Celera assembler, so we added "in Celera assembler" at the end of the sentence as follow:  
"The assembled contig revealed a contig coverage of approximately 36.57x from Celera assembler."

10. Page 5: Why were the selected parameters in Celera selected? Are these simply generally optimized default parameters?"

Author's response:

We had tried some optimized Celera assembler parameters, but default option generated best result, although some parameter was optimized for our computer power. Our experience was identical to other genome cases.

11. Page 5: "Contigs from the initial assembly were used for scaffolding using the stand-alone scaffolding tool SSPACE (ver. 2.0) [11]. Trimmed mate-pair reads created using the FASTX-Toolkit were used in the scaffolding process".

Can the authors please provide enough information on the SSPACE parameters employed to allow the reader to repeat the analysis?"

378 We added the parameters at the end of the sentence as follow:

379 “Contigs from the initial assembly were used for scaffolding using the stand-alone scaffolding tool  
380 SSPACE (ver. 2.0) with the following parameters: -x 0, -k 3, -a 0.8, and -T 60 [11].”

381

382 12. Page 5: "After scaffolding, the number of scaffolds decreased from 153,398 to 12,381, and the N50  
383 scaffold length increased from 6,135 to 166,726 bp (Table 2)."

384 The authors might consider stating the total size of the final scaffolds (~795 Mb), which is approaching  
385 the genome size according to the K-mer analysis.

386

387 We added this sentence at the end of paragraph:

388 “The total size of the final scaffolds (~795 Mb) was consistent with the estimated genome size (805  
389 Mb).”

390

391 13. Page 6: "We first identified repetitive elements using RepeatMasker (ver. 3.3.0) [13], and this  
392 masked genome sequence was used for ab initio gene prediction using the SNAP software [14]"

393 Can the authors please provide more details on their use of RepeatMasker? Which repeats were used?  
394 How were they generated bioinformatically?

395

396 We changed manuscript as follow:

397 “MAKER2 annotation pipeline was used for genome annotation with default parameters [12]. It first  
398 identified repetitive elements using RepeatMasker (ver. 3.3.0) with a *de novo* repeat library [13], which  
399 was constructed using RepeatModeler (Ver. 1.0.3) [14] with the Repbase library (Ver. 20140131). The  
400 SNAP gene finder [15] was selected to perform *ab initio* gene prediction from this masked genome  
401 sequence.”

402

403 14. Page 6: "Transcriptome assembly results, which were generated using CLC Genomics Workbench  
404 8.0, were used for expressed sequence tags"

405 Some more details are needed here. Can the authors please clarify the information in terms of the  
406 parameters used in CLC? Also, was there not a step to go from a raw transcriptome to a reference  
407 transcriptome assembly used for annotation?

408

409 We changed manuscript as follow:

410 “Transcriptome assembly was performed by using the program CLC Genomics Workbench 8.0 with  
411 default parameters, and sequencing reads from PE500 (Table 1) were used.”

412

413 15. Page 6: "A total of 32,712 genes were predicted in *P. charcoti* using MAKER, and 61,709 ab initio

414 prediction, with insufficient evidence were generated (Table 2)."

415 Much of the information listed in the text is not linked to Table 2. Can the authors please check they  
416 have included all information intended in Table 2?

417

418 [We deleted the ab initio prediction in manuscript and added more information into Table 2.](#)

419

420 16. Page 7: Minor point - consider using the term 'partial' rather than 'Fragmented' in Table 1, to be  
421 better aligned to information given in the text (or used 'fragmented' in the text). Would the authors also  
422 like to comment on why the number of vertebrate BUSCO genes is substantially lower than the  
423 eukaryotic or metazoan set?

424

425 [We change “fragmented” with “Partial” in Table 3.](#)

426 [We did re-run BUSCO analysis to the Actinopterygii DB, and changed Table 3 with new results as  
427 reviewer’s comments.](#)

428

429 17. Page 8: "We identified 8,951 orthologous groups common to all seven fish; 288 of 32,636 N.  
430 coriiceps genes and 333 of 32,712 P. charcoti genes were not identified in any other species, and 2,519  
431 groups were identified only in the two Antarctic fish (Fig. 3A). Subsequently, gene gain-and loss was  
432 analyzed in seven representative fish species, P. charcoti gained 937 and lost 1916 gene families (Fig.  
433 3B)."

434 The authors must provide methods to explain how the phylogenetic tree provided in Figure 3 was  
435 produced and how they performed the gene gain/loss approach. I suspect the methods are the same as  
436 presented in Shin et al. 2014, but this should be clarified. I also must request that the authors either  
437 directly provide (or offer some easy way) for an interested reader to extract the relevant subsets of the  
438 8,951 orthogroups (e.g. 333 genes specific to P. charcoti; 258 genes specific to N. coriiceps; 2,519  
439 common to the two Antarctic fish) as these will be a useful start point for future investigations. Looking  
440 at the current data provided in the GigaDB repository, I can only see the 8,951 orthogroups.

441

442 [The method producing a “gain-and-loss” was added to manuscript, and we uploaded additional  
443 orthogroups data into GigaDB \(orthologues\\_List\\_specific\\_Antarctic\\_fish.txt\)](#)

444

445 18. Page 10: "Availability of supporting data". The authors should break down the full set of data  
446 attached in the GigaDB online repository.

447

448 [We mended as comment.](#)

449

May 00, 2017

**Dear Dr. Hans Zauner, Editor of GigaScience,**

We would like to thank you and all the reviewers for your kind help to revise our manuscript and consider our manuscript for publication in GigaScience.

As reviewer comment, we corrected manuscript and added new sentences for revised manuscript. The corrected points were marked in blue color in revised manuscript; “Antarctic dragonfish-R1\_ADH-fixed\_02\_Plain text.docx”. Please refer to rebuttal letter “revision\_R1\_ADH-fixed\_02\_Plain text.docx” for response to reviewers.

Our changed data files were loaded in GigaDB as folder " Revision01\_Data for GigaScience manuscript GIGA-D-17-00041 ". Please refer to the text file “README for Revision01(List of changed file).txt” for list of changed files.

Hope the revised is acceptable for publication. We look forward to hearing your decision.

Thank you very much for your consideration of this paper,

Hyun Park,

Hyun Park, Ph. D.  
Korea Polar Research Institute  
26 Songdomirae-ro, Yeonsu-gu,  
Incheon 406-840, South Korea  
Tel: +82-32-760-5570/Fax: +82-32-760-5575  
e-mail: hpark@kopri.re.kr

Supporting data for "Draft genome of the Antarctic dragonfish,  
*Parachaenichthys charcoti*"

=====  
=====  
Ahn, D, H; Shin, S, C; Kim, B, M; Kang, S; Kim, J, H; Ahn, I; Park, J;  
Park, H  
(2017) GigaScience Database.

#### Summary

-----  
The Antarctic bathydraconid dragonfish, *Parachaenichthys charcoti*, is an Antarctic notothenioid teleost endemic to the Southern Ocean. The Southern Ocean has cooled to ~1.8°C over the past 30 million years, and the seawater had retained cold temperature and isolated oceanic environment by Antarctic Circumpolar Current (ACC). Notothenioids dominate Antarctic fish, making up 90% biomass and all notothenioids have undergone molecular and ecological diversification to survive in this cold environment. Therefore, they are considered an attractive Antarctic fish model for evolutionary and ancestral genomic studies. Bathydraconidae is a speciose family of the Notothenioidei, the dominant taxonomic component of Antarctic teleosts. To understand the process of evolution of Antarctic fish, we select a typical Antarctic bathydraconid dragonfish, *P. charcoti*. Here, we have sequenced, de novo assembled and annotated a comprehensive genome from *P. charcoti*.

The draft genome of *P. charcoti* is 709 Mb in size. The N50 contig length is 6,145 bp and its N50 scaffold length 178,362 kb. The genome of *P. charcoti* is predicted to contain 32,712 genes, 18,455 of which have been assigned preliminary functions. A total of 8,951 orthologous groups common to seven species fish were identified, while 333 genes were identified in *P. charcoti* only; 2,519 orthologous groups were also identified in both *P. charcoti* and *N. coriiceps*, another Antarctic fish. Four gene ontology (GO) terms were statistically overrepresented among the 333 genes unique to *P. charcoti*, according to GO enrichment analysis.

The draft *P. charcoti* genome will broaden our understanding of the evolution of Antarctic fish in their extreme environment. It will provide a basis for further investigating the unusual characteristics of Antarctic fishes.

sequence data deposited with the SRA

-----  
BioProject : PRJNA330735  
Genomic and transcriptomic sequence data

(1) BioSample: SAMN05421612



muscle from *Parachaenichthys charcoti*, genomic DNA

(2) BioSample: SAMN05421683

liver sample from *Parachaenichthys charcoti*, genomic DNA

(3) BioSample: SAMN06232533

liver sample from *Parachaenichthys charcoti*, transcriptome

#### Files

-----

(1) PC-genome\_assembly.fasta

genome assembly file (fasta)

(2) PC-transcriptome\_assembly.fasta

transcriptome assembly file (fasta)

(3) PC-coding gene annotations.gff3

coding gene annotations (gff3)

(4) PC-coding gene nucleotide sequences.fasta

coding gene nucleotide sequences (fasta)

(5) PC-coding gene translated sequences.fasta

coding gene translated sequences (fasta)

(6) PC-repeatmasker.gff3

repeats annotations (gff3)

(7) PC-snap.gff3

snap annotations (gff3)

(8) Blast2Go\_annotation\_with\_AED.tab [changed file]

blast2Go annotation results with AED value (tab)

(9) multi-fasta\_alignments\_orthologues.zip

Zip file of orthologous gene family alignments (multi-fasta)

(10) multi-fasta\_alignments\_orthologues List.txt

Summarized list of orthologous gene family alignments

(11) BUSCO\_Actinopterygii\_report.txt [changed file]

summarized BUSCO output report in the Actinopterygii lineage dataset

(12) orthologues\_List\_specific\_Antarctic\_fish.txt [new added file]

orthologues list in Antarctic fish

(13) Phylogenetic Tree.nwk

description of a rooted and bifurcating phylogenetic tree

(14) README.txt [changed file]

including all file names with a brief description of each
